# Supplementary material for: Seasonal Variation in the Voluntary Food Intake of Domesticated Cats (Felis Catus)
Source: PLoS One. 2014 Apr 23;9(4):e96071. doi: 10.1371/journal.pone.0096071 (PMC3997493; doi:10.1371/journal.pone.0096071)
Supplement: Spreadsheet S1 — Computer spreadsheet summarising all of the data used in the study. Separate columns are include of cats identification number (cats), overweight status (group), year, month, food intake (in g), body weight (in kg), sex, sexual status (I = intact; N = neutered), average monthly temperature (°C), daylight length (in s), and the composite of temperature and daylight length (T°×Daylight). (XLSX) [file pone.0096071.s001.xlsx]

## Sheet: Feuil1
Cats	Group	Year	Months	Food intake (g)	BW (kg)	sex	sex status	Monthly T (°C)	Daylight (s)	T° x Daylight
C1	IW	2006	Jan	45.5333	2.37	F	I	5.9	33751	199131
C2	IW	2006	Jan	41.5167	3.26	F	I	5.9	33751	199131
C3	IW	2006	Jan	45.3167	2.59	F	N	5.9	33751	199131
C4	IW	2006	Jan	20.9167	3.24	F	N	5.9	33751	199131
C5	IW	2006	Jan	38.9833	3.18	M	N	5.9	33751	199131
C6	IW	2006	Jan	63.8621	2.82	F	I	5.9	33751	199131
C7	IW	2006	Jan	42.425	3.58	M	I	5.9	33751	199131
C8	IW	2006	Jan	65.8276	3.37	M	N	5.9	33751	199131
C9	IW	2006	Jan	83.0179	3.83	M	I	5.9	33751	199131
C10	IW	2006	Jan	48.9167	3.71	M	N	5.9	33751	199131
C11	IW	2006	Jan	39.1833	2.2	F	I	5.9	33751	199131
C12	IW	2006	Jan	56.2333	3.57	M	N	5.9	33751	199131
C13	IW	2006	Jan	44.6552	2.14	F	N	5.9	33751	199131
C14	IW	2006	Jan	43.9	3.01	F	I	5.9	33751	199131
C15	IW	2006	Jan	51.3966	3.78	F	N	5.9	33751	199131
C16	IW	2006	Jan	36.5893	3.87	M	N	5.9	33751	199131
C17	IW	2006	Jan	27.7333	3.58	M	N	5.9	33751	199131
C18	IW	2006	Jan	51.7414	4.31	F	I	5.9	33751	199131
C19	IW	2006	Jan	53.3846	3.65	F	N	5.9	33751	199131
C20	IW	2006	Jan	51.4	3.93	F	I	5.9	33751	199131
C21	IW	2006	Jan	55.1333	3.36	F	I	5.9	33751	199131
C22	IW	2006	Jan	53.9	3.69	F	N	5.9	33751	199131
C23	OW	2006	Jan	62.4167	3.77	M	N	5.9	33751	199131
C24	OW	2006	Jan	29.8704	2.62	F	I	5.9	33751	199131
C25	OW	2006	Jan	54.9167	3.62	F	N	5.9	33751	199131
C26	OW	2006	Jan	77.5667	3.9	F	I	5.9	33751	199131
C27	OW	2006	Jan	85.25	4	F	N	5.9	33751	199131
C28	OW	2006	Jan	58.4833	3.79	M	N	5.9	33751	199131
C29	OW	2006	Jan	59.1333	3.79	F	I	5.9	33751	199131
C30	OW	2006	Jan	63.3103	5.29	F	N	5.9	33751	199131
C31	OW	2006	Jan	48.25	4.49	M	N	5.9	33751	199131
C32	OW	2006	Jan	77.75	4.44	M	N	5.9	33751	199131
C33	OW	2006	Jan	63.1667	4.8	M	N	5.9	33751	199131
C34	OW	2006	Jan	81.8519	3.74	F	N	5.9	33751	199131
C35	OW	2006	Jan	99.4655	8.57	M	N	5.9	33751	199131
C36	OW	2006	Jan	74.9828	6.85	M	N	5.9	33751	199131
C37	OW	2006	Jan	66.9333	7.15	M	N	5.9	33751	199131
C38	OW	2006	Jan	81.2	6.06	M	N	5.9	33751	199131
C1	IW	2006	Feb	40.2321	2.37	F	I	6.6	37953	250490
C2	IW	2006	Feb	44.4107	3.16	F	I	6.6	37953	250490
C3	IW	2006	Feb	41.463	2.63	F	N	6.6	37953	250490
C4	IW	2006	Feb	23.45	3.14	F	N	6.6	37953	250490
C5	IW	2006	Feb	41.9286	3.17	M	N	6.6	37953	250490
C6	IW	2006	Feb	80.1786	3.07	F	I	6.6	37953	250490
C7	IW	2006	Feb	43.3261	3.31	M	I	6.6	37953	250490
C8	IW	2006	Feb	120.125	3.29	M	N	6.6	37953	250490
C9	IW	2006	Feb	68.3269	3.7	M	I	6.6	37953	250490
C10	IW	2006	Feb	46.8929	3.7	M	N	6.6	37953	250490
C11	IW	2006	Feb	38.3519	2.2	F	I	6.6	37953	250490
C12	IW	2006	Feb	54.6786	3.61	M	N	6.6	37953	250490
C13	IW	2006	Feb	44.5536	2.1	F	N	6.6	37953	250490
C14	IW	2006	Feb	36.4444	2.85	F	I	6.6	37953	250490
C15	IW	2006	Feb	51.9643	3.6	F	N	6.6	37953	250490
C16	IW	2006	Feb	33.5385	3.77	M	N	6.6	37953	250490
C17	IW	2006	Feb	29.5714	3.35	M	N	6.6	37953	250490
C18	IW	2006	Feb	40.1786	4.24	F	I	6.6	37953	250490
C19	IW	2006	Feb	61.5385	3.6	F	N	6.6	37953	250490
C20	IW	2006	Feb	50.5536	3.87	F	I	6.6	37953	250490
C21	IW	2006	Feb	64.7963	3.71	F	I	6.6	37953	250490
C22	IW	2006	Feb	43.7143	3.65	F	N	6.6	37953	250490
C23	OW	2006	Feb	67.5714	3.94	M	N	6.6	37953	250490
C24	OW	2006	Feb	27.5962	2.59	F	I	6.6	37953	250490
C25	OW	2006	Feb	63.537	3.7	F	N	6.6	37953	250490
C26	OW	2006	Feb	50.8519	3.98	F	I	6.6	37953	250490
C27	OW	2006	Feb	92.4286	4.09	F	N	6.6	37953	250490
C28	OW	2006	Feb	49.7037	4.08	M	N	6.6	37953	250490
C29	OW	2006	Feb	60.1071	3.77	F	I	6.6	37953	250490
C30	OW	2006	Feb	57.5577	5.3	F	N	6.6	37953	250490
C31	OW	2006	Feb	39.875	4.4	M	N	6.6	37953	250490
C32	OW	2006	Feb	92.6607	4.44	M	N	6.6	37953	250490
C33	OW	2006	Feb	66.2222	4.8	M	N	6.6	37953	250490
C34	OW	2006	Feb	71.5	3.5	F	N	6.6	37953	250490
C35	OW	2006	Feb	98.625	8.6	M	N	6.6	37953	250490
C36	OW	2006	Feb	74.9643	6.8	M	N	6.6	37953	250490
C37	OW	2006	Feb	68.5893	7.04	M	N	6.6	37953	250490
C38	OW	2006	Feb	82.1296	6.3	M	N	6.6	37953	250490
C1	IW	2006	March	33.4032	2.32	F	I	10.5	43200	453600
C2	IW	2006	March	40.129	3.02	F	I	10.5	43200	453600
C3	IW	2006	March	40.1774	2.7	F	N	10.5	43200	453600
C4	IW	2006	March	35.2941	3.06	F	N	10.5	43200	453600
C5	IW	2006	March	37.9516	3.1	M	N	10.5	43200	453600
C6	IW	2006	March	63.6613	3.07	F	I	10.5	43200	453600
C7	IW	2006	March	43.4355	3.25	M	I	10.5	43200	453600
C8	IW	2006	March	75.6452	3.16	M	N	10.5	43200	453600
C9	IW	2006	March	64.2097	3.61	M	I	10.5	43200	453600
C10	IW	2006	March	45.3871	3.66	M	N	10.5	43200	453600
C11	IW	2006	March	42.7419	2.38	F	I	10.5	43200	453600
C12	IW	2006	March	60.9839	3.85	M	N	10.5	43200	453600
C13	IW	2006	March	48.9	2.28	F	N	10.5	43200	453600
C14	IW	2006	March	36.2	2.87	F	I	10.5	43200	453600
C15	IW	2006	March	46.5484	3.45	F	N	10.5	43200	453600
C16	IW	2006	March	33.92	3.66	M	N	10.5	43200	453600
C17	IW	2006	March	32.3065	3.26	M	N	10.5	43200	453600
C18	IW	2006	March	57.2833	4.04	F	I	10.5	43200	453600
C19	IW	2006	March	74.9762	3.54	F	N	10.5	43200	453600
C20	IW	2006	March	50.7258	3.66	F	I	10.5	43200	453600
C21	IW	2006	March	58.875	3.77	F	I	10.5	43200	453600
C22	IW	2006	March	36.25	3.92	F	N	10.5	43200	453600
C23	OW	2006	March	75.0968	3.98	M	N	10.5	43200	453600
C24	OW	2006	March	33.6724	2.65	F	I	10.5	43200	453600
C25	OW	2006	March	52.8594	3.96	F	N	10.5	43200	453600
C26	OW	2006	March	64.125	3.89	F	I	10.5	43200	453600
C27	OW	2006	March	61.7742	4	F	N	10.5	43200	453600
C28	OW	2006	March	45.1562	4.16	M	N	10.5	43200	453600
C29	OW	2006	March	58.1613	3.82	F	I	10.5	43200	453600
C30	OW	2006	March	56.0833	5.2	F	N	10.5	43200	453600
C31	OW	2006	March	38	4.24	M	N	10.5	43200	453600
C32	OW	2006	March	95.15	4.41	M	N	10.5	43200	453600
C33	OW	2006	March	60.7344	4.81	M	N	10.5	43200	453600
C34	OW	2006	March	51.0556	3.44	F	N	10.5	43200	453600
C35	OW	2006	March	93.7903	8.54	M	N	10.5	43200	453600
C36	OW	2006	March	71.5167	6.69	M	N	10.5	43200	453600
C37	OW	2006	March	69.9032	7.09	M	N	10.5	43200	453600
C38	OW	2006	March	86.6875	6.21	M	N	10.5	43200	453600
C1	IW	2006	April	32.4259	2.33	F	I	15.1	48610	734011
C2	IW	2006	April	45.7667	3.05	F	I	15.1	48610	734011
C3	IW	2006	April	36.5484	2.63	F	N	15.1	48610	734011
C4	IW	2006	April	20.2857	2.98	F	N	15.1	48610	734011
C5	IW	2006	April	38.4655	3.1	M	N	15.1	48610	734011
C6	IW	2006	April	41.2963	2.08	F	I	15.1	48610	734011
C7	IW	2006	April	38.375	3.33	M	I	15.1	48610	734011
C8	IW	2006	April	44.4828	3.09	M	N	15.1	48610	734011
C9	IW	2006	April	75.6786	3.61	M	I	15.1	48610	734011
C10	IW	2006	April	50.7037	3.63	M	N	15.1	48610	734011
C11	IW	2006	April	32.1613	2.15	F	I	15.1	48610	734011
C12	IW	2006	April	56.3548	3.77	M	N	15.1	48610	734011
C13	IW	2006	April	46.46	2.29	F	N	15.1	48610	734011
C14	IW	2006	April	30.5	2.8	F	I	15.1	48610	734011
C15	IW	2006	April	46.3704	3.34	F	N	15.1	48610	734011
C16	IW	2006	April	45.3958	3.6	M	N	15.1	48610	734011
C17	IW	2006	April	37.65	3.17	M	N	15.1	48610	734011
C18	IW	2006	April	43.4167	4.03	F	I	15.1	48610	734011
C19	IW	2006	April	68.2955	3.48	F	N	15.1	48610	734011
C20	IW	2006	April	51.6833	3.73	F	I	15.1	48610	734011
C21	IW	2006	April	43.4074	3.65	F	I	15.1	48610	734011
C22	IW	2006	April	56.25	3.49	F	N	15.1	48610	734011
C23	OW	2006	April	66.05	4	M	N	15.1	48610	734011
C24	OW	2006	April	31.9	2.7	F	I	15.1	48610	734011
C25	OW	2006	April	45.5185	3.5	F	N	15.1	48610	734011
C26	OW	2006	April	36.76	3.68	F	I	15.1	48610	734011
C27	OW	2006	April	57.6333	3.9	F	N	15.1	48610	734011
C28	OW	2006	April	45.5577	4.38	M	N	15.1	48610	734011
C29	OW	2006	April	51.9839	3.83	F	I	15.1	48610	734011
C30	OW	2006	April	54.88	5	F	N	15.1	48610	734011
C31	OW	2006	April	38	4.21	M	N	15.1	48610	734011
C32	OW	2006	April	71.0833	4.06	M	N	15.1	48610	734011
C33	OW	2006	April	56.8846	4.76	M	N	15.1	48610	734011
C34	OW	2006	April	40.3214	3.36	F	N	15.1	48610	734011
C35	OW	2006	April	95.5741	8.63	M	N	15.1	48610	734011
C36	OW	2006	April	65.5	6.58	M	N	15.1	48610	734011
C37	OW	2006	April	66.5333	7.01	M	N	15.1	48610	734011
C38	OW	2006	April	68.1346	5.15	M	N	15.1	48610	734011
C1	IW	2006	May	26.7167	2.32	F	I	18.5	53164	983534
C2	IW	2006	May	46.2581	3.04	F	I	18.5	53164	983534
C3	IW	2006	May	39.4194	2.62	F	N	18.5	53164	983534
C4	IW	2006	May	20.75	2.9	F	N	18.5	53164	983534
C5	IW	2006	May	41.5333	3.1	M	N	18.5	53164	983534
C6	IW	2006	May	50.4355	3.01	F	I	18.5	53164	983534
C7	IW	2006	May	40.4355	3.38	M	I	18.5	53164	983534
C8	IW	2006	May	32.5484	2.98	M	N	18.5	53164	983534
C9	IW	2006	May	87.3226	3.64	M	I	18.5	53164	983534
C10	IW	2006	May	39.7258	3.44	M	N	18.5	53164	983534
C11	IW	2006	May	32.8226	2.22	F	I	18.5	53164	983534
C12	IW	2006	May	47.9032	3.65	M	N	18.5	53164	983534
C13	IW	2006	May	56.2833	2.15	F	N	18.5	53164	983534
C14	IW	2006	May	32.3	2.65	F	I	18.5	53164	983534
C15	IW	2006	May	47.7097	3.35	F	N	18.5	53164	983534
C16	IW	2006	May	45.1833	3.78	M	N	18.5	53164	983534
C17	IW	2006	May	42.5323	3.28	M	N	18.5	53164	983534
C18	IW	2006	May	52.8966	4.12	F	I	18.5	53164	983534
C19	IW	2006	May	92.6429	3.36	F	N	18.5	53164	983534
C20	IW	2006	May	55.6129	3.75	F	I	18.5	53164	983534
C21	IW	2006	May	51.5484	3.7	F	I	18.5	53164	983534
C22	IW	2006	May	57.1071	3.51	F	N	18.5	53164	983534
C23	OW	2006	May	63	4	M	N	18.5	53164	983534
C24	OW	2006	May	37.2667	2.7	F	I	18.5	53164	983534
C25	OW	2006	May	54.05	3.74	F	N	18.5	53164	983534
C26	OW	2006	May	62.5172	3.9	F	I	18.5	53164	983534
C27	OW	2006	May	48.4	3.75	F	N	18.5	53164	983534
C28	OW	2006	May	46.8333	4.1	M	N	18.5	53164	983534
C29	OW	2006	May	57	3.81	F	I	18.5	53164	983534
C30	OW	2006	May	42.3103	4.91	F	N	18.5	53164	983534
C31	OW	2006	May	38.2258	4.25	M	N	18.5	53164	983534
C32	OW	2006	May	103.633	4.27	M	N	18.5	53164	983534
C33	OW	2006	May	54.4032	4.77	M	N	18.5	53164	983534
C34	OW	2006	May	43.4516	3.23	F	N	18.5	53164	983534
C35	OW	2006	May	84.0323	8.78	M	N	18.5	53164	983534
C36	OW	2006	May	48.0357	6.62	M	N	18.5	53164	983534
C37	OW	2006	May	68.5323	7.05	M	N	18.5	53164	983534
C38	OW	2006	May	62.0161	6.02	M	N	18.5	53164	983534
C1	IW	2006	June	26.9833	2.32	F	I	22.9	55402	1.26871e+06
C2	IW	2006	June	45.3667	3.4	F	I	22.9	55402	1.26871e+06
C3	IW	2006	June	36.0333	2.62	F	N	22.9	55402	1.26871e+06
C4	IW	2006	June	35.3571	2.9	F	N	22.9	55402	1.26871e+06
C5	IW	2006	June	42.9167	3.1	M	N	22.9	55402	1.26871e+06
C6	IW	2006	June	52.537	3.01	F	I	22.9	55402	1.26871e+06
C7	IW	2006	June	42.3448	3.38	M	I	22.9	55402	1.26871e+06
C8	IW	2006	June	26.6167	2.98	M	N	22.9	55402	1.26871e+06
C9	IW	2006	June	61.0536	3.64	M	I	22.9	55402	1.26871e+06
C10	IW	2006	June	34.1167	3.44	M	N	22.9	55402	1.26871e+06
C11	IW	2006	June	34.3833	2.22	F	I	22.9	55402	1.26871e+06
C12	IW	2006	June	50.0333	3.65	M	N	22.9	55402	1.26871e+06
C13	IW	2006	June	44.8036	2.15	F	N	22.9	55402	1.26871e+06
C14	IW	2006	June	32.9821	2.65	F	I	22.9	55402	1.26871e+06
C15	IW	2006	June	46.8	3.35	F	N	22.9	55402	1.26871e+06
C16	IW	2006	June	40.6296	3.78	M	N	22.9	55402	1.26871e+06
C17	IW	2006	June	43.0667	3.28	M	N	22.9	55402	1.26871e+06
C18	IW	2006	June	51.4667	4.12	F	I	22.9	55402	1.26871e+06
C19	IW	2006	June	76.1667	3.36	F	N	22.9	55402	1.26871e+06
C20	IW	2006	June	50.6333	3.75	F	I	22.9	55402	1.26871e+06
C21	IW	2006	June	36.9677	3.7	F	I	22.9	55402	1.26871e+06
C22	IW	2006	June	57.1154	3.51	F	N	22.9	55402	1.26871e+06
C23	OW	2006	June	61.5833	3.96	M	N	22.9	55402	1.26871e+06
C24	OW	2006	June	40.9333	2.87	F	I	22.9	55402	1.26871e+06
C25	OW	2006	June	38.871	3.74	F	N	22.9	55402	1.26871e+06
C26	OW	2006	June	39.2419	3.9	F	I	22.9	55402	1.26871e+06
C27	OW	2006	June	72.9	3.65	F	N	22.9	55402	1.26871e+06
C28	OW	2006	June	46.0323	4.1	M	N	22.9	55402	1.26871e+06
C29	OW	2006	June	50.2	3.81	F	I	22.9	55402	1.26871e+06
C30	OW	2006	June	50.1667	4.91	F	N	22.9	55402	1.26871e+06
C31	OW	2006	June	41.5667	4.25	M	N	22.9	55402	1.26871e+06
C32	OW	2006	June	90.6379	4.27	M	N	22.9	55402	1.26871e+06
C33	OW	2006	June	47.129	4.77	M	N	22.9	55402	1.26871e+06
C34	OW	2006	June	36.8478	3.23	F	N	22.9	55402	1.26871e+06
C35	OW	2006	June	80.45	8.78	M	N	22.9	55402	1.26871e+06
C36	OW	2006	June	40.0208	6.62	M	N	22.9	55402	1.26871e+06
C37	OW	2006	June	67.7	7.05	M	N	22.9	55402	1.26871e+06
C38	OW	2006	June	64.0161	6.02	M	N	22.9	55402	1.26871e+06
C1	IW	2006	July	28.7667	2.32	F	I	28.5	54103	1.54194e+06
C2	IW	2006	July	44.0806	3.14	F	I	28.5	54103	1.54194e+06
C3	IW	2006	July	35.1935	2.63	F	N	28.5	54103	1.54194e+06
C4	IW	2006	July	33.7	3	F	N	28.5	54103	1.54194e+06
C5	IW	2006	July	42.3871	3.07	M	N	28.5	54103	1.54194e+06
C6	IW	2006	July	33.8125	3	F	I	28.5	54103	1.54194e+06
C7	IW	2006	July	35.3966	3.35	M	I	28.5	54103	1.54194e+06
C8	IW	2006	July	36.5323	3.03	M	N	28.5	54103	1.54194e+06
C9	IW	2006	July	52.3	3.56	M	I	28.5	54103	1.54194e+06
C10	IW	2006	July	39.371	3.4	M	N	28.5	54103	1.54194e+06
C11	IW	2006	July	30.6452	2.2	F	I	28.5	54103	1.54194e+06
C12	IW	2006	July	50.4194	3.68	M	N	28.5	54103	1.54194e+06
C13	IW	2006	July	45.371	2.15	F	N	28.5	54103	1.54194e+06
C14	IW	2006	July	35.2667	2.76	F	I	28.5	54103	1.54194e+06
C15	IW	2006	July	51.7258	3.32	F	N	28.5	54103	1.54194e+06
C16	IW	2006	July	37.8621	3.73	M	N	28.5	54103	1.54194e+06
C17	IW	2006	July	47.3833	3.32	M	N	28.5	54103	1.54194e+06
C18	IW	2006	July	55.4677	4.26	F	I	28.5	54103	1.54194e+06
C19	IW	2006	July	52.5	3.47	F	N	28.5	54103	1.54194e+06
C20	IW	2006	July	50.0833	3.81	F	I	28.5	54103	1.54194e+06
C21	IW	2006	July	44.7581	3.61	F	I	28.5	54103	1.54194e+06
C22	IW	2006	July	43.7857	3.54	F	N	28.5	54103	1.54194e+06
C23	OW	2006	July	63.8226	4.14	M	N	28.5	54103	1.54194e+06
C24	OW	2006	July	41.4839	3	F	I	28.5	54103	1.54194e+06
C25	OW	2006	July	47.0645	3.66	F	N	28.5	54103	1.54194e+06
C26	OW	2006	July	47.3548	3.57	F	I	28.5	54103	1.54194e+06
C27	OW	2006	July	56.9194	3.65	F	N	28.5	54103	1.54194e+06
C28	OW	2006	July	43.3333	4.1	M	N	28.5	54103	1.54194e+06
C29	OW	2006	July	53.8548	3.85	F	I	28.5	54103	1.54194e+06
C30	OW	2006	July	61.129	4.88	F	N	28.5	54103	1.54194e+06
C31	OW	2006	July	47.6136	4.3	M	N	28.5	54103	1.54194e+06
C32	OW	2006	July	70.0667	4.24	M	N	28.5	54103	1.54194e+06
C33	OW	2006	July	53.5	4.67	M	N	28.5	54103	1.54194e+06
C34	OW	2006	July	20.6429	3.31	F	N	28.5	54103	1.54194e+06
C35	OW	2006	July	85.8548	8.62	M	N	28.5	54103	1.54194e+06
C36	OW	2006	July	69.871	6.66	M	N	28.5	54103	1.54194e+06
C37	OW	2006	July	65.3871	7.09	M	N	28.5	54103	1.54194e+06
C38	OW	2006	July	76.7903	5.94	M	N	28.5	54103	1.54194e+06
C1	IW	2006	Aug	28.9032	2.32	F	I	23.1	49997	1.15493e+06
C2	IW	2006	Aug	43.7258	3.05	F	I	23.1	49997	1.15493e+06
C3	IW	2006	Aug	29.5741	2.51	F	N	23.1	49997	1.15493e+06
C4	IW	2006	Aug	56.0333	2.9	F	N	23.1	49997	1.15493e+06
C5	IW	2006	Aug	53.9677	3.07	M	N	23.1	49997	1.15493e+06
C6	IW	2006	Aug	45.5333	2.95	F	I	23.1	49997	1.15493e+06
C7	IW	2006	Aug	45.9	3.54	M	I	23.1	49997	1.15493e+06
C8	IW	2006	Aug	39.4677	3.01	M	N	23.1	49997	1.15493e+06
C9	IW	2006	Aug	49.5333	3.79	M	I	23.1	49997	1.15493e+06
C10	IW	2006	Aug	52.8226	3.4	M	N	23.1	49997	1.15493e+06
C11	IW	2006	Aug	29.129	2.1	F	I	23.1	49997	1.15493e+06
C12	IW	2006	Aug	50.9355	3.73	M	N	23.1	49997	1.15493e+06
C13	IW	2006	Aug	42.4032	2.09	F	N	23.1	49997	1.15493e+06
C14	IW	2006	Aug	31.0323	2.67	F	I	23.1	49997	1.15493e+06
C15	IW	2006	Aug	52.8065	3.35	F	N	23.1	49997	1.15493e+06
C16	IW	2006	Aug	57.7667	3.65	M	N	23.1	49997	1.15493e+06
C17	IW	2006	Aug	42.871	3.45	M	N	23.1	49997	1.15493e+06
C18	IW	2006	Aug	48.1613	4.25	F	I	23.1	49997	1.15493e+06
C19	IW	2006	Aug	81.569	3.3	F	N	23.1	49997	1.15493e+06
C20	IW	2006	Aug	52.8548	3.75	F	I	23.1	49997	1.15493e+06
C21	IW	2006	Aug	34.8167	3.62	F	I	23.1	49997	1.15493e+06
C22	IW	2006	Aug	49.9286	3.39	F	N	23.1	49997	1.15493e+06
C23	OW	2006	Aug	68	4.13	M	N	23.1	49997	1.15493e+06
C24	OW	2006	Aug	43.1935	3.09	F	I	23.1	49997	1.15493e+06
C25	OW	2006	Aug	37.5645	3.63	F	N	23.1	49997	1.15493e+06
C26	OW	2006	Aug	40.7258	3.73	F	I	23.1	49997	1.15493e+06
C27	OW	2006	Aug	57.8621	3.56	F	N	23.1	49997	1.15493e+06
C28	OW	2006	Aug	37.2679	4.47	M	N	23.1	49997	1.15493e+06
C29	OW	2006	Aug	47.6452	3.8	F	I	23.1	49997	1.15493e+06
C30	OW	2006	Aug	54.75	4.92	F	N	23.1	49997	1.15493e+06
C31	OW	2006	Aug	46.5161	4.19	M	N	23.1	49997	1.15493e+06
C32	OW	2006	Aug	62.9355	4.25	M	N	23.1	49997	1.15493e+06
C33	OW	2006	Aug	62.6129	4.65	M	N	23.1	49997	1.15493e+06
C34	OW	2006	Aug	33.6	3.63	F	N	23.1	49997	1.15493e+06
C35	OW	2006	Aug	91.0161	8.63	M	N	23.1	49997	1.15493e+06
C36	OW	2006	Aug	75.9483	6.78	M	N	23.1	49997	1.15493e+06
C37	OW	2006	Aug	77.2097	7.09	M	N	23.1	49997	1.15493e+06
C38	OW	2006	Aug	89.3226	6.41	M	N	23.1	49997	1.15493e+06
C1	IW	2006	sept	30.0172	2.31	F	I	21.6	44808	967853
C2	IW	2006	sept	54.7586	3.17	F	I	21.6	44808	967853
C3	IW	2006	sept	54.75	2.53	F	N	21.6	44808	967853
C4	IW	2006	sept	46.35	2.93	F	N	21.6	44808	967853
C5	IW	2006	sept	58.2833	3.23	M	N	21.6	44808	967853
C6	IW	2006	sept	48.7	2.87	F	I	21.6	44808	967853
C7	IW	2006	sept	35.4259	3.65	M	I	21.6	44808	967853
C8	IW	2006	sept	36.7586	3.01	M	N	21.6	44808	967853
C9	IW	2006	sept	41.875	3.92	M	I	21.6	44808	967853
C10	IW	2006	sept	57.7	3.6	M	N	21.6	44808	967853
C11	IW	2006	sept	33.7667	2.13	F	I	21.6	44808	967853
C12	IW	2006	sept	41.8667	3.7	M	N	21.6	44808	967853
C13	IW	2006	sept	51.5833	2.06	F	N	21.6	44808	967853
C14	IW	2006	sept	42.1034	2.64	F	I	21.6	44808	967853
C15	IW	2006	sept	55.1167	3.36	F	N	21.6	44808	967853
C16	IW	2006	sept	52.85	3.66	M	N	21.6	44808	967853
C17	IW	2006	sept	48.3	3.41	M	N	21.6	44808	967853
C18	IW	2006	sept	50.1167	4.21	F	I	21.6	44808	967853
C19	IW	2006	sept	88.5167	3.25	F	N	21.6	44808	967853
C20	IW	2006	sept	60.3667	3.76	F	I	21.6	44808	967853
C21	IW	2006	sept	36.4	3.48	F	I	21.6	44808	967853
C22	IW	2006	sept	55.6471	3.36	F	N	21.6	44808	967853
C23	OW	2006	sept	63.8833	4.04	M	N	21.6	44808	967853
C24	OW	2006	sept	42.5333	2.28	F	I	21.6	44808	967853
C25	OW	2006	sept	37.9167	3.49	F	N	21.6	44808	967853
C26	OW	2006	sept	38.35	3.49	F	I	21.6	44808	967853
C27	OW	2006	sept	62.6897	3.5	F	N	21.6	44808	967853
C28	OW	2006	sept	24.6522	4.27	M	N	21.6	44808	967853
C29	OW	2006	sept	46.35	3.75	F	I	21.6	44808	967853
C30	OW	2006	sept	56.4107	4.91	F	N	21.6	44808	967853
C31	OW	2006	sept	51.0333	4.21	M	N	21.6	44808	967853
C32	OW	2006	sept	67.2667	4.26	M	N	21.6	44808	967853
C33	OW	2006	sept	54.7778	4.69	M	N	21.6	44808	967853
C34	OW	2006	sept	25	3.71	F	N	21.6	44808	967853
C35	OW	2006	sept	85.6167	8.6	M	N	21.6	44808	967853
C36	OW	2006	sept	78.1154	6.71	M	N	21.6	44808	967853
C37	OW	2006	sept	69.8333	7.21	M	N	21.6	44808	967853
C38	OW	2006	sept	77.4655	6.24	M	N	21.6	44808	967853
C1	IW	2006	oct	30.069	2.28	F	I	18.3	39441	721770
C2	IW	2006	oct	61.069	3.22	F	I	18.3	39441	721770
C3	IW	2006	oct	83.1452	2.5	F	N	18.3	39441	721770
C4	IW	2006	oct	48.8889	2.97	F	N	18.3	39441	721770
C5	IW	2006	oct	52.871	3.4	M	N	18.3	39441	721770
C6	IW	2006	oct	37.0968	2.9	F	I	18.3	39441	721770
C7	IW	2006	oct	20.1458	3.55	M	I	18.3	39441	721770
C8	IW	2006	oct	40.8871	3.09	M	N	18.3	39441	721770
C9	IW	2006	oct	36.913	3.88	M	I	18.3	39441	721770
C10	IW	2006	oct	51.6207	3.7	M	N	18.3	39441	721770
C11	IW	2006	oct	34.3871	2.17	F	I	18.3	39441	721770
C12	IW	2006	oct	47.8	3.53	M	N	18.3	39441	721770
C13	IW	2006	oct	63.3065	2.14	F	N	18.3	39441	721770
C14	IW	2006	oct	43.9	2.8	F	I	18.3	39441	721770
C15	IW	2006	oct	55.4355	3.61	F	N	18.3	39441	721770
C16	IW	2006	oct	47.85	3.72	M	N	18.3	39441	721770
C17	IW	2006	oct	47.2258	3.63	M	N	18.3	39441	721770
C18	IW	2006	oct	51.4677	4.22	F	I	18.3	39441	721770
C19	IW	2006	oct	81.8276	3.25	F	N	18.3	39441	721770
C20	IW	2006	oct	58.5968	3.89	F	I	18.3	39441	721770
C21	IW	2006	oct	39	3.4	F	I	18.3	39441	721770
C22	IW	2006	oct	62.3333	3.36	F	N	18.3	39441	721770
C23	OW	2006	oct	68.6774	4.21	M	N	18.3	39441	721770
C24	OW	2006	oct	35.2097	3.11	F	I	18.3	39441	721770
C25	OW	2006	oct	27.069	3.36	F	N	18.3	39441	721770
C26	OW	2006	oct	40.5179	3.37	F	I	18.3	39441	721770
C27	OW	2006	oct	43.9032	3.49	F	N	18.3	39441	721770
C28	OW	2006	oct	20	4.14	M	N	18.3	39441	721770
C29	OW	2006	oct	48.9516	3.74	F	I	18.3	39441	721770
C30	OW	2006	oct	64	4.83	F	N	18.3	39441	721770
C31	OW	2006	oct	59.7	4.34	M	N	18.3	39441	721770
C32	OW	2006	oct	63.2903	4.35	M	N	18.3	39441	721770
C33	OW	2006	oct	65.7097	4.53	M	N	18.3	39441	721770
C34	OW	2006	oct	29.8571	3.77	F	N	18.3	39441	721770
C35	OW	2006	oct	97.2581	8.7	M	N	18.3	39441	721770
C36	OW	2006	oct	85.1613	6.63	M	N	18.3	39441	721770
C37	OW	2006	oct	70.5667	7.23	M	N	18.3	39441	721770
C38	OW	2006	oct	75.6	6.04	M	N	18.3	39441	721770
C1	IW	2006	nov	34.6667	2.34	F	I	13.1	34738	455068
C2	IW	2006	nov	56.55	3.53	F	I	13.1	34738	455068
C3	IW	2006	nov	76.6167	2.5	F	N	13.1	34738	455068
C4	IW	2006	nov	38.25	3.12	F	N	13.1	34738	455068
C5	IW	2006	nov	50	3.39	M	N	13.1	34738	455068
C6	IW	2006	nov	23.8448	2.89	F	I	13.1	34738	455068
C7	IW	2006	nov	21.9737	3.67	M	I	13.1	34738	455068
C8	IW	2006	nov	44.3167	3.24	M	N	13.1	34738	455068
C9	IW	2006	nov	58.9655	4.16	M	I	13.1	34738	455068
C10	IW	2006	nov	54.9667	3.67	M	N	13.1	34738	455068
C11	IW	2006	nov	34.6	2.2	F	I	13.1	34738	455068
C12	IW	2006	nov	49.2167	3.52	M	N	13.1	34738	455068
C13	IW	2006	nov	61.9333	2.19	F	N	13.1	34738	455068
C14	IW	2006	nov	33.1724	2.9	F	I	13.1	34738	455068
C15	IW	2006	nov	59.8167	3.68	F	N	13.1	34738	455068
C16	IW	2006	nov	55.75	3.59	M	N	13.1	34738	455068
C17	IW	2006	nov	40.2759	3.68	M	N	13.1	34738	455068
C18	IW	2006	nov	55	4.34	F	I	13.1	34738	455068
C19	IW	2006	nov	73.913	3.45	F	N	13.1	34738	455068
C20	IW	2006	nov	59.6833	3.8	F	I	13.1	34738	455068
C21	IW	2006	nov	36.5862	3.21	F	I	13.1	34738	455068
C22	IW	2006	nov	50.1316	3.42	F	N	13.1	34738	455068
C23	OW	2006	nov	59.1333	4.34	M	N	13.1	34738	455068
C24	OW	2006	nov	35.2241	3.19	F	I	13.1	34738	455068
C25	OW	2006	nov	42.4333	3.5	F	N	13.1	34738	455068
C26	OW	2006	nov	39.75	3.33	F	I	13.1	34738	455068
C27	OW	2006	nov	67.7333	3.48	F	N	13.1	34738	455068
C28	OW	2006	nov	46.3	4.23	M	N	13.1	34738	455068
C29	OW	2006	nov	51.4667	3.73	F	I	13.1	34738	455068
C30	OW	2006	nov	59.4828	4.83	F	N	13.1	34738	455068
C31	OW	2006	nov	57.45	4.57	M	N	13.1	34738	455068
C32	OW	2006	nov	91.7833	4.39	M	N	13.1	34738	455068
C33	OW	2006	nov	63.5167	4.51	M	N	13.1	34738	455068
C34	OW	2006	nov	34.7391	3.66	F	N	13.1	34738	455068
C35	OW	2006	nov	96.8167	8.84	M	N	13.1	34738	455068
C36	OW	2006	nov	74.15	6.66	M	N	13.1	34738	455068
C37	OW	2006	nov	63.2833	7.17	M	N	13.1	34738	455068
C38	OW	2006	nov	61.3167	5.95	M	N	13.1	34738	455068
C1	IW	2006	dec	40.9167	2.47	F	I	7.8	32380	252564
C2	IW	2006	dec	55.3621	3.67	F	I	7.8	32380	252564
C3	IW	2006	dec	112.75	2.58	F	N	7.8	32380	252564
C4	IW	2006	dec	42.9062	3.21	F	N	7.8	32380	252564
C5	IW	2006	dec	30.931	3.43	M	N	7.8	32380	252564
C6	IW	2006	dec	23.4286	2.9	F	I	7.8	32380	252564
C7	IW	2006	dec	29.0385	3.75	M	I	7.8	32380	252564
C8	IW	2006	dec	58.05	3.4	M	N	7.8	32380	252564
C9	IW	2006	dec	48.4655	4.4	M	I	7.8	32380	252564
C10	IW	2006	dec	62.2	3.92	M	N	7.8	32380	252564
C11	IW	2006	dec	36.3833	2.28	F	I	7.8	32380	252564
C12	IW	2006	dec	64	3.58	M	N	7.8	32380	252564
C13	IW	2006	dec	53.1333	2.2	F	N	7.8	32380	252564
C14	IW	2006	dec	38.0517	2.88	F	I	7.8	32380	252564
C15	IW	2006	dec	57.5833	3.9	F	N	7.8	32380	252564
C16	IW	2006	dec	66.6034	3.96	M	N	7.8	32380	252564
C17	IW	2006	dec	39.4792	3.78	M	N	7.8	32380	252564
C18	IW	2006	dec	57.6	4.47	F	I	7.8	32380	252564
C19	IW	2006	dec	54.0652	3.66	F	N	7.8	32380	252564
C20	IW	2006	dec	61.4483	3.8	F	I	7.8	32380	252564
C21	IW	2006	dec	54.4667	3.16	F	I	7.8	32380	252564
C22	IW	2006	dec	31.3125	3.48	F	N	7.8	32380	252564
C23	OW	2006	dec	52.6667	2.75	M	N	7.8	32380	252564
C24	OW	2006	dec	42.6167	2.42	F	I	7.8	32380	252564
C25	OW	2006	dec	54.5	3.53	F	N	7.8	32380	252564
C26	OW	2006	dec	62	3.16	F	I	7.8	32380	252564
C27	OW	2006	dec	84.1724	3.59	F	N	7.8	32380	252564
C28	OW	2006	dec	24.0333	4.43	M	N	7.8	32380	252564
C29	OW	2006	dec	60.6833	3.79	F	I	7.8	32380	252564
C30	OW	2006	dec	68.4231	5.07	F	N	7.8	32380	252564
C31	OW	2006	dec	61.8276	4.74	M	N	7.8	32380	252564
C32	OW	2006	dec	63.7333	4.52	M	N	7.8	32380	252564
C33	OW	2006	dec	69.2167	4.65	M	N	7.8	32380	252564
C34	OW	2006	dec	71.12	3.85	F	N	7.8	32380	252564
C35	OW	2006	dec	95.4333	9.07	M	N	7.8	32380	252564
C36	OW	2006	dec	65.5667	7	M	N	7.8	32380	252564
C37	OW	2006	dec	60.8667	7.32	M	N	7.8	32380	252564
C38	OW	2006	dec	74.0833	5.91	M	N	7.8	32380	252564
C1	IW	2007	Jan	43.7931	2.63	F	I	9.3	33751	313884
C2	IW	2007	Jan	41.8929	3.74	F	I	9.3	33751	313884
C3	IW	2007	Jan	112.655	2.69	F	N	9.3	33751	313884
C4	IW	2007	Jan	41.7115	3.28	F	N	9.3	33751	313884
C5	IW	2007	Jan	45.2241	3.41	M	N	9.3	33751	313884
C6	IW	2007	Jan	24.1731	2.9	F	I	9.3	33751	313884
C7	IW	2007	Jan	38.3276	3.46	M	I	9.3	33751	313884
C8	IW	2007	Jan	57.125	3.37	M	N	9.3	33751	313884
C9	IW	2007	Jan	50.7586	4.12	M	I	9.3	33751	313884
C10	IW	2007	Jan	66.2143	4.04	M	N	9.3	33751	313884
C11	IW	2007	Jan	38.6724	2.28	F	I	9.3	33751	313884
C12	IW	2007	Jan	60.5357	3.69	M	N	9.3	33751	313884
C13	IW	2007	Jan	55.2931	2.23	F	N	9.3	33751	313884
C14	IW	2007	Jan	41.1724	2.92	F	I	9.3	33751	313884
C15	IW	2007	Jan	48.2679	3.8	F	N	9.3	33751	313884
C16	IW	2007	Jan	59.5	4.07	M	N	9.3	33751	313884
C17	IW	2007	Jan	25.2679	3.42	M	N	9.3	33751	313884
C18	IW	2007	Jan	49.4138	4.4	F	I	9.3	33751	313884
C19	IW	2007	Jan	79.5263	3.7	F	N	9.3	33751	313884
C20	IW	2007	Jan	54.0172	3.94	F	I	9.3	33751	313884
C21	IW	2007	Jan	58.45	3.27	F	I	9.3	33751	313884
C22	IW	2007	Jan	65	3.6	F	N	9.3	33751	313884
C23	OW	2007	Jan	48.2414	4.46	M	N	9.3	33751	313884
C24	OW	2007	Jan	31.2692	3.35	F	I	9.3	33751	313884
C25	OW	2007	Jan	49.6042	3.53	F	N	9.3	33751	313884
C26	OW	2007	Jan	96.4583	3.16	F	I	9.3	33751	313884
C27	OW	2007	Jan	90.2586	3.93	F	N	9.3	33751	313884
C28	OW	2007	Jan	26.6875	4.43	M	N	9.3	33751	313884
C29	OW	2007	Jan	57.3448	3.93	F	I	9.3	33751	313884
C30	OW	2007	Jan	60	5.14	F	N	9.3	33751	313884
C31	OW	2007	Jan	53.6724	4.79	M	N	9.3	33751	313884
C32	OW	2007	Jan	46.2759	4.59	M	N	9.3	33751	313884
C33	OW	2007	Jan	65.7708	4.65	M	N	9.3	33751	313884
C34	OW	2007	Jan	89.1207	4.21	F	N	9.3	33751	313884
C35	OW	2007	Jan	92.4107	9.07	M	N	9.3	33751	313884
C36	OW	2007	Jan	49.7069	6.99	M	N	9.3	33751	313884
C37	OW	2007	Jan	75.1724	7.26	M	N	9.3	33751	313884
C38	OW	2007	Jan	87.7292	5.91	M	N	9.3	33751	313884
C1	IW	2007	Feb	38.6429	2.68	F	I	9.6	37953	364349
C2	IW	2007	Feb	35.8333	3.41	F	I	9.6	37953	364349
C3	IW	2007	Feb	83.3478	2.65	F	N	9.6	37953	364349
C4	IW	2007	Feb	32.6923	3.12	F	N	9.6	37953	364349
C5	IW	2007	Feb	41.4821	3.3	M	N	9.6	37953	364349
C6	IW	2007	Feb	43.6	2.9	F	I	9.6	37953	364349
C7	IW	2007	Feb	58.1607	3.27	M	I	9.6	37953	364349
C8	IW	2007	Feb	58.46	3.36	M	N	9.6	37953	364349
C9	IW	2007	Feb	52.3704	3.89	M	I	9.6	37953	364349
C10	IW	2007	Feb	41.1429	3.92	M	N	9.6	37953	364349
C11	IW	2007	Feb	42.8214	2.25	F	I	9.6	37953	364349
C12	IW	2007	Feb	51.7885	3.74	M	N	9.6	37953	364349
C13	IW	2007	Feb	55.3333	2.3	F	N	9.6	37953	364349
C14	IW	2007	Feb	40.5192	3.01	F	I	9.6	37953	364349
C15	IW	2007	Feb	50.6607	3.79	F	N	9.6	37953	364349
C16	IW	2007	Feb	49.9231	3.97	M	N	9.6	37953	364349
C17	IW	2007	Feb	36.1852	3.22	M	N	9.6	37953	364349
C18	IW	2007	Feb	44.4107	4.34	F	I	9.6	37953	364349
C19	IW	2007	Feb	25.8529	3.64	F	N	9.6	37953	364349
C20	IW	2007	Feb	48.92	4.06	F	I	9.6	37953	364349
C21	IW	2007	Feb	60.9688	3.62	F	I	9.6	37953	364349
C22	IW	2007	Feb	57.2778	3.7	F	N	9.6	37953	364349
C23	OW	2007	Feb	54.75	4.26	M	N	9.6	37953	364349
C24	OW	2007	Feb	38.6538	3.52	F	I	9.6	37953	364349
C25	OW	2007	Feb	55.875	3.95	F	N	9.6	37953	364349
C26	OW	2007	Feb	96.0625	4.02	F	I	9.6	37953	364349
C27	OW	2007	Feb	77.8214	3.9	F	N	9.6	37953	364349
C28	OW	2007	Feb	20	4.38	M	N	9.6	37953	364349
C29	OW	2007	Feb	52.3214	3.88	F	I	9.6	37953	364349
C30	OW	2007	Feb	49.3214	5.12	F	N	9.6	37953	364349
C31	OW	2007	Feb	44.1731	4.9	M	N	9.6	37953	364349
C32	OW	2007	Feb	36.9821	4.48	M	N	9.6	37953	364349
C33	OW	2007	Feb	54.5	4.65	M	N	9.6	37953	364349
C34	OW	2007	Feb	66.1538	4.28	F	N	9.6	37953	364349
C35	OW	2007	Feb	86.1607	9.02	M	N	9.6	37953	364349
C36	OW	2007	Feb	40.1964	6.87	M	N	9.6	37953	364349
C37	OW	2007	Feb	70.7143	7.45	M	N	9.6	37953	364349
C38	OW	2007	Feb	72.7188	6.22	M	N	9.6	37953	364349
C1	IW	2007	March	36.3636	2.64	F	I	11.6	43200	501120
C2	IW	2007	March	40.3438	3.23	F	I	11.6	43200	501120
C3	IW	2007	March	35.2258	2.6	F	N	11.6	43200	501120
C4	IW	2007	March	23.1053	3.06	F	N	11.6	43200	501120
C5	IW	2007	March	45.7903	3.27	M	N	11.6	43200	501120
C6	IW	2007	March	25.6562	3.3	F	I	11.6	43200	501120
C7	IW	2007	March	45.5781	3.27	M	I	11.6	43200	501120
C8	IW	2007	March	45.5806	3.26	M	N	11.6	43200	501120
C9	IW	2007	March	56.3788	3.89	M	I	11.6	43200	501120
C10	IW	2007	March	46.4688	3.89	M	N	11.6	43200	501120
C11	IW	2007	March	39.1935	2.32	F	I	11.6	43200	501120
C12	IW	2007	March	51.25	3.63	M	N	11.6	43200	501120
C13	IW	2007	March	53.3333	2.32	F	N	11.6	43200	501120
C14	IW	2007	March	41.8485	3.05	F	I	11.6	43200	501120
C15	IW	2007	March	66.3871	3.93	F	N	11.6	43200	501120
C16	IW	2007	March	51.9375	3.85	M	N	11.6	43200	501120
C17	IW	2007	March	43.8636	3.11	M	N	11.6	43200	501120
C18	IW	2007	March	48.5606	4.26	F	I	11.6	43200	501120
C19	IW	2007	March	35.1167	3.48	F	N	11.6	43200	501120
C20	IW	2007	March	47.3788	3.93	F	I	11.6	43200	501120
C21	IW	2007	March	62.8966	3.63	F	I	11.6	43200	501120
C22	IW	2007	March	56	3.53	F	N	11.6	43200	501120
C23	OW	2007	March	71.0484	4.33	M	N	11.6	43200	501120
C24	OW	2007	March	42	3.47	F	I	11.6	43200	501120
C25	OW	2007	March	48.7241	4.03	F	N	11.6	43200	501120
C26	OW	2007	March	77.7241	4.06	F	I	11.6	43200	501120
C27	OW	2007	March	109.844	3.88	F	N	11.6	43200	501120
C28	OW	2007	March	20	4.33	M	N	11.6	43200	501120
C29	OW	2007	March	58.3906	3.86	F	I	11.6	43200	501120
C30	OW	2007	March	54.3333	5.07	F	N	11.6	43200	501120
C31	OW	2007	March	43.3548	4.76	M	N	11.6	43200	501120
C32	OW	2007	March	41.7727	4.46	M	N	11.6	43200	501120
C33	OW	2007	March	63.963	4.96	M	N	11.6	43200	501120
C34	OW	2007	March	76.3788	4.12	F	N	11.6	43200	501120
C35	OW	2007	March	89.8182	9.07	M	N	11.6	43200	501120
C36	OW	2007	March	35	6.94	M	N	11.6	43200	501120
C37	OW	2007	March	70.0938	7.51	M	N	11.6	43200	501120
C38	OW	2007	March	86.6897	6.12	M	N	11.6	43200	501120
C1	IW	2007	April	33.569	2.7	F	I	17	48610	826370
C2	IW	2007	April	45.0517	3.32	F	I	17	48610	826370
C3	IW	2007	April	33.5167	2.56	F	N	17	48610	826370
C4	IW	2007	April	23.5238	3.04	F	N	17	48610	826370
C5	IW	2007	April	42.431	3.2	M	N	17	48610	826370
C6	IW	2007	April	45.0862	3.3	F	I	17	48610	826370
C7	IW	2007	April	55.0862	3.37	M	I	17	48610	826370
C8	IW	2007	April	55.1207	3.25	M	N	17	48610	826370
C9	IW	2007	April	63.4138	3.71	M	I	17	48610	826370
C10	IW	2007	April	41.8667	3.87	M	N	17	48610	826370
C11	IW	2007	April	40.0893	2.32	F	I	17	48610	826370
C12	IW	2007	April	51.2	3.65	M	N	17	48610	826370
C13	IW	2007	April	56.7667	2.28	F	N	17	48610	826370
C14	IW	2007	April	32.625	3.1	F	I	17	48610	826370
C15	IW	2007	April	64.3667	3.97	F	N	17	48610	826370
C16	IW	2007	April	51.1034	3.95	M	N	17	48610	826370
C17	IW	2007	April	39.55	3.35	M	N	17	48610	826370
C18	IW	2007	April	52.3966	4.33	F	I	17	48610	826370
C19	IW	2007	April	55.0238	3.7	F	N	17	48610	826370
C20	IW	2007	April	51.3276	3.78	F	I	17	48610	826370
C21	IW	2007	April	66.8167	3.74	F	I	17	48610	826370
C22	IW	2007	April	56.25	3.67	F	N	17	48610	826370
C23	OW	2007	April	68.35	4.34	M	N	17	48610	826370
C24	OW	2007	April	35.3889	3.64	F	I	17	48610	826370
C25	OW	2007	April	34.1167	3.93	F	N	17	48610	826370
C26	OW	2007	April	73.8667	4.2	F	I	17	48610	826370
C27	OW	2007	April	74.05	3.85	F	N	17	48610	826370
C28	OW	2007	April	20.3636	4.16	M	N	17	48610	826370
C29	OW	2007	April	54.1833	3.95	F	I	17	48610	826370
C30	OW	2007	April	55.1667	5.03	F	N	17	48610	826370
C31	OW	2007	April	38.8833	4.76	M	N	17	48610	826370
C32	OW	2007	April	55.5667	4.27	M	N	17	48610	826370
C33	OW	2007	April	72.6167	4.97	M	N	17	48610	826370
C34	OW	2007	April	57	3.72	F	N	17	48610	826370
C35	OW	2007	April	96.5333	9.18	M	N	17	48610	826370
C36	OW	2007	April	52.875	6.74	M	N	17	48610	826370
C37	OW	2007	April	61.6875	7.53	M	N	17	48610	826370
C38	OW	2007	April	73.7833	6.12	M	N	17	48610	826370
C1	IW	2007	May	35.6034	2.62	F	I	19	53164	1010116
C2	IW	2007	May	49.1964	3.28	F	I	19	53164	1010116
C3	IW	2007	May	36.1167	2.58	F	N	19	53164	1010116
C4	IW	2007	May	42.1731	2.89	F	N	19	53164	1010116
C5	IW	2007	May	42.2833	3.18	M	N	19	53164	1010116
C6	IW	2007	May	42.25	3.32	F	I	19	53164	1010116
C7	IW	2007	May	44.9138	3.41	M	I	19	53164	1010116
C8	IW	2007	May	59.5833	3.23	M	N	19	53164	1010116
C9	IW	2007	May	57.2	3.64	M	I	19	53164	1010116
C10	IW	2007	May	52.45	3.87	M	N	19	53164	1010116
C11	IW	2007	May	36.6333	2.22	F	I	19	53164	1010116
C12	IW	2007	May	57.2833	3.67	M	N	19	53164	1010116
C13	IW	2007	May	52.15	2.17	F	N	19	53164	1010116
C14	IW	2007	May	33.0536	3.02	F	I	19	53164	1010116
C15	IW	2007	May	71.4667	4.2	F	N	19	53164	1010116
C16	IW	2007	May	50.4333	3.86	M	N	19	53164	1010116
C17	IW	2007	May	43.6034	3.33	M	N	19	53164	1010116
C18	IW	2007	May	61.9667	4.44	F	I	19	53164	1010116
C19	IW	2007	May	40	3.72	F	N	19	53164	1010116
C20	IW	2007	May	56.3103	3.75	F	I	19	53164	1010116
C21	IW	2007	May	78.35	3.64	F	I	19	53164	1010116
C22	IW	2007	May	57.1071	3.74	F	N	19	53164	1010116
C23	OW	2007	May	70.8333	4.35	M	N	19	53164	1010116
C24	OW	2007	May	35.4333	3.49	F	I	19	53164	1010116
C25	OW	2007	May	40.9667	3.93	F	N	19	53164	1010116
C26	OW	2007	May	57.3621	4.2	F	I	19	53164	1010116
C27	OW	2007	May	56.45	3.85	F	N	19	53164	1010116
C28	OW	2007	May	20	4.19	M	N	19	53164	1010116
C29	OW	2007	May	53.9667	3.97	F	I	19	53164	1010116
C30	OW	2007	May	57	5.13	F	N	19	53164	1010116
C31	OW	2007	May	41.6552	4.59	M	N	19	53164	1010116
C32	OW	2007	May	50.2667	4.37	M	N	19	53164	1010116
C33	OW	2007	May	84.4167	4.92	M	N	19	53164	1010116
C34	OW	2007	May	35.5	3.97	F	N	19	53164	1010116
C35	OW	2007	May	94.3667	9.39	M	N	19	53164	1010116
C36	OW	2007	May	65.6667	6.74	M	N	19	53164	1010116
C37	OW	2007	May	43.5	7.46	M	N	19	53164	1010116
C38	OW	2007	May	63.6833	6.34	M	N	19	53164	1010116
C1	IW	2007	June	31.2222	2.69	F	I	22	55402	1218844
C2	IW	2007	June	47.5714	3.28	F	I	22	55402	1218844
C3	IW	2007	June	40.2778	2.63	F	N	22	55402	1218844
C4	IW	2007	June	35.0385	2.76	F	N	22	55402	1218844
C5	IW	2007	June	43.125	3.15	M	N	22	55402	1218844
C6	IW	2007	June	24.3519	3.21	F	I	22	55402	1218844
C7	IW	2007	June	45.6964	3.45	M	I	22	55402	1218844
C8	IW	2007	June	69.6667	3.3	M	N	22	55402	1218844
C9	IW	2007	June	57.8966	3.66	M	I	22	55402	1218844
C10	IW	2007	June	49.375	3.82	M	N	22	55402	1218844
C11	IW	2007	June	38.8276	2.28	F	I	22	55402	1218844
C12	IW	2007	June	59.7143	3.75	M	N	22	55402	1218844
C13	IW	2007	June	39.25	2.18	F	N	22	55402	1218844
C14	IW	2007	June	28.38	2.69	F	I	22	55402	1218844
C15	IW	2007	June	41.6897	4.2	F	N	22	55402	1218844
C16	IW	2007	June	55.0893	2.9	M	N	22	55402	1218844
C17	IW	2007	June	42.9138	3.34	M	N	22	55402	1218844
C18	IW	2007	June	53.5172	4.49	F	I	22	55402	1218844
C19	IW	2007	June	28.225	3.55	F	N	22	55402	1218844
C20	IW	2007	June	54.4643	3.7	F	I	22	55402	1218844
C21	IW	2007	June	56.0345	3.75	F	I	22	55402	1218844
C22	IW	2007	June	57.1154	3.67	F	N	22	55402	1218844
C23	OW	2007	June	67.2414	4.45	M	N	22	55402	1218844
C24	OW	2007	June	38.125	3.6	F	I	22	55402	1218844
C25	OW	2007	June	51.6034	3.73	F	N	22	55402	1218844
C26	OW	2007	June	75.2586	4.2	F	I	22	55402	1218844
C27	OW	2007	June	90.8966	3.7	F	N	22	55402	1218844
C28	OW	2007	June	26.8276	4.29	M	N	22	55402	1218844
C29	OW	2007	June	52.0893	3.98	F	I	22	55402	1218844
C30	OW	2007	June	52.5714	5.11	F	N	22	55402	1218844
C31	OW	2007	June	39.7333	4.61	M	N	22	55402	1218844
C32	OW	2007	June	68.6897	4.4	M	N	22	55402	1218844
C33	OW	2007	June	56.9655	4.85	M	N	22	55402	1218844
C34	OW	2007	June	26.4091	5.08	F	N	22	55402	1218844
C35	OW	2007	June	85.569	9.42	M	N	22	55402	1218844
C36	OW	2007	June	83.431	6.8	M	N	22	55402	1218844
C37	OW	2007	June	22.0714	7.82	M	N	22	55402	1218844
C38	OW	2007	June	54.3966	6.35	M	N	22	55402	1218844
C1	IW	2007	July	30.3793	2.7	F	I	23.7	54103	1.28224e+06
C2	IW	2007	July	40.8036	3.43	F	I	23.7	54103	1.28224e+06
C3	IW	2007	July	36.5172	2.57	F	N	23.7	54103	1.28224e+06
C4	IW	2007	July	26.5455	2.86	F	N	23.7	54103	1.28224e+06
C5	IW	2007	July	39.6429	3.1	M	N	23.7	54103	1.28224e+06
C6	IW	2007	July	22.2931	2.96	F	I	23.7	54103	1.28224e+06
C7	IW	2007	July	57.5769	3.39	M	I	23.7	54103	1.28224e+06
C8	IW	2007	July	52.5	3.2	M	N	23.7	54103	1.28224e+06
C9	IW	2007	July	65.0862	3.7	M	I	23.7	54103	1.28224e+06
C10	IW	2007	July	39.8621	3.79	M	N	23.7	54103	1.28224e+06
C11	IW	2007	July	35.8103	2.16	F	I	23.7	54103	1.28224e+06
C12	IW	2007	July	57.2586	3.74	M	N	23.7	54103	1.28224e+06
C13	IW	2007	July	41.3929	2.12	F	N	23.7	54103	1.28224e+06
C14	IW	2007	July	40.2292	2.72	F	I	23.7	54103	1.28224e+06
C15	IW	2007	July	41.1724	3.82	F	N	23.7	54103	1.28224e+06
C16	IW	2007	July	52.8276	3.88	M	N	23.7	54103	1.28224e+06
C17	IW	2007	July	46.2241	3.48	M	N	23.7	54103	1.28224e+06
C18	IW	2007	July	55.3448	4.59	F	I	23.7	54103	1.28224e+06
C19	IW	2007	July	32.6111	3.5	F	N	23.7	54103	1.28224e+06
C20	IW	2007	July	54.431	3.65	F	I	23.7	54103	1.28224e+06
C21	IW	2007	July	71.7069	3.7	F	I	23.7	54103	1.28224e+06
C22	IW	2007	July	64.3621	3.73	F	N	23.7	54103	1.28224e+06
C23	OW	2007	July	67.569	4.39	M	N	23.7	54103	1.28224e+06
C24	OW	2007	July	32.069	3.7	F	I	23.7	54103	1.28224e+06
C25	OW	2007	July	40.1724	3.77	F	N	23.7	54103	1.28224e+06
C26	OW	2007	July	46.3448	3.97	F	I	23.7	54103	1.28224e+06
C27	OW	2007	July	117.397	3.7	F	N	23.7	54103	1.28224e+06
C28	OW	2007	July	21.6458	4.33	M	N	23.7	54103	1.28224e+06
C29	OW	2007	July	51.1786	3.85	F	I	23.7	54103	1.28224e+06
C30	OW	2007	July	58.8276	4.98	F	N	23.7	54103	1.28224e+06
C31	OW	2007	July	42.7647	4.58	M	N	23.7	54103	1.28224e+06
C32	OW	2007	July	99.3103	4.34	M	N	23.7	54103	1.28224e+06
C33	OW	2007	July	71.4643	4.7	M	N	23.7	54103	1.28224e+06
C34	OW	2007	July	31.3182	3.63	F	N	23.7	54103	1.28224e+06
C35	OW	2007	July	89.6897	9.35	M	N	23.7	54103	1.28224e+06
C36	OW	2007	July	72.4138	6.77	M	N	23.7	54103	1.28224e+06
C37	OW	2007	July	28.0185	7.94	M	N	23.7	54103	1.28224e+06
C38	OW	2007	July	72.0536	6.1	M	N	23.7	54103	1.28224e+06
C1	IW	2007	Aug	44.8226	2.718	F	I	23.5	49997	1.17493e+06
C2	IW	2007	Aug	40.9167	3.28	F	I	23.5	49997	1.17493e+06
C3	IW	2007	Aug	34.7833	2.68	F	N	23.5	49997	1.17493e+06
C4	IW	2007	Aug	49.6842	2.88	F	N	23.5	49997	1.17493e+06
C5	IW	2007	Aug	46.5806	3.22	M	N	23.5	49997	1.17493e+06
C6	IW	2007	Aug	20	3.153	F	I	23.5	49997	1.17493e+06
C7	IW	2007	Aug	46.5167	3.59	M	I	23.5	49997	1.17493e+06
C8	IW	2007	Aug	53.9355	3.21	M	N	23.5	49997	1.17493e+06
C9	IW	2007	Aug	69.5667	3.88	M	I	23.5	49997	1.17493e+06
C10	IW	2007	Aug	41.6452	3.91	M	N	23.5	49997	1.17493e+06
C11	IW	2007	Aug	35.3793	2.226	F	I	23.5	49997	1.17493e+06
C12	IW	2007	Aug	50.1034	3.882	M	N	23.5	49997	1.17493e+06
C13	IW	2007	Aug	59.2742	2.482	F	N	23.5	49997	1.17493e+06
C14	IW	2007	Aug	45.1667	2.91	F	I	23.5	49997	1.17493e+06
C15	IW	2007	Aug	48.5806	3.66	F	N	23.5	49997	1.17493e+06
C16	IW	2007	Aug	58.7581	3.934	M	N	23.5	49997	1.17493e+06
C17	IW	2007	Aug	46.9032	3.57	M	N	23.5	49997	1.17493e+06
C18	IW	2007	Aug	61.85	4.75	F	I	23.5	49997	1.17493e+06
C19	IW	2007	Aug	34.9423	3.62	F	N	23.5	49997	1.17493e+06
C20	IW	2007	Aug	51.2258	3.74	F	I	23.5	49997	1.17493e+06
C21	IW	2007	Aug	65.6765	3.622	F	I	23.5	49997	1.17493e+06
C22	IW	2007	Aug	51.7097	3.7	F	N	23.5	49997	1.17493e+06
C23	OW	2007	Aug	68.2667	4.585	M	N	23.5	49997	1.17493e+06
C24	OW	2007	Aug	32.8548	3.702	F	I	23.5	49997	1.17493e+06
C25	OW	2007	Aug	53.875	3.744	F	N	23.5	49997	1.17493e+06
C26	OW	2007	Aug	79.5294	3.706	F	I	23.5	49997	1.17493e+06
C27	OW	2007	Aug	84.3871	3.7	F	N	23.5	49997	1.17493e+06
C28	OW	2007	Aug	56.2857	4.43	M	N	23.5	49997	1.17493e+06
C29	OW	2007	Aug	46.6833	3.986	F	I	23.5	49997	1.17493e+06
C30	OW	2007	Aug	60.371	5.2	F	N	23.5	49997	1.17493e+06
C31	OW	2007	Aug	44.5	4.61	M	N	23.5	49997	1.17493e+06
C32	OW	2007	Aug	96.3226	4.487	M	N	23.5	49997	1.17493e+06
C33	OW	2007	Aug	80.5143	4.596	M	N	23.5	49997	1.17493e+06
C34	OW	2007	Aug	50.1833	3.71	F	N	23.5	49997	1.17493e+06
C35	OW	2007	Aug	94.3387	9.55	M	N	23.5	49997	1.17493e+06
C36	OW	2007	Aug	48.4677	6.96	M	N	23.5	49997	1.17493e+06
C37	OW	2007	Aug	31.6333	8.15	M	N	23.5	49997	1.17493e+06
C38	OW	2007	Aug	59.0588	5.81	M	N	23.5	49997	1.17493e+06
C1	IW	2007	sept	56.85	2.64	F	I	20.4	44808	914083
C2	IW	2007	sept	52.25	3.27	F	I	20.4	44808	914083
C3	IW	2007	sept	34.3833	2.67	F	N	20.4	44808	914083
C4	IW	2007	sept	48.619	2.99	F	N	20.4	44808	914083
C5	IW	2007	sept	53	3.32	M	N	20.4	44808	914083
C6	IW	2007	sept	20	3.42	F	I	20.4	44808	914083
C7	IW	2007	sept	44.9828	3.59	M	I	20.4	44808	914083
C8	IW	2007	sept	54.25	3.14	M	N	20.4	44808	914083
C9	IW	2007	sept	80.55	4.18	M	I	20.4	44808	914083
C10	IW	2007	sept	44.7833	3.85	M	N	20.4	44808	914083
C11	IW	2007	sept	32.6833	2.23	F	I	20.4	44808	914083
C12	IW	2007	sept	49.4655	3.86	M	N	20.4	44808	914083
C13	IW	2007	sept	75.7667	2.75	F	N	20.4	44808	914083
C14	IW	2007	sept	40.7167	2.95	F	I	20.4	44808	914083
C15	IW	2007	sept	53.5667	3.6	F	N	20.4	44808	914083
C16	IW	2007	sept	51.1667	3.81	M	N	20.4	44808	914083
C17	IW	2007	sept	43.4667	3.54	M	N	20.4	44808	914083
C18	IW	2007	sept	46.4833	4.55	F	I	20.4	44808	914083
C19	IW	2007	sept	83.2333	3.66	F	N	20.4	44808	914083
C20	IW	2007	sept	59.2333	3.79	F	I	20.4	44808	914083
C21	IW	2007	sept	66.675	3.66	F	I	20.4	44808	914083
C22	IW	2007	sept	60.0893	3.74	F	N	20.4	44808	914083
C23	OW	2007	sept	69.4167	4.63	M	N	20.4	44808	914083
C24	OW	2007	sept	30.6481	3.69	F	I	20.4	44808	914083
C25	OW	2007	sept	41.2195	3.75	F	N	20.4	44808	914083
C26	OW	2007	sept	51.186	3.93	F	I	20.4	44808	914083
C27	OW	2007	sept	41.5	3.6	F	N	20.4	44808	914083
C28	OW	2007	sept	34.878	4.56	M	N	20.4	44808	914083
C29	OW	2007	sept	47.2	3.9	F	I	20.4	44808	914083
C30	OW	2007	sept	52.9423	5.06	F	N	20.4	44808	914083
C31	OW	2007	sept	48.3667	4.56	M	N	20.4	44808	914083
C32	OW	2007	sept	113.776	4.44	M	N	20.4	44808	914083
C33	OW	2007	sept	63.5909	4.75	M	N	20.4	44808	914083
C34	OW	2007	sept	65.6167	4.04	F	N	20.4	44808	914083
C35	OW	2007	sept	83.9	9.2	M	N	20.4	44808	914083
C36	OW	2007	sept	27.0185	6.86	M	N	20.4	44808	914083
C37	OW	2007	sept	36.037	8.2	M	N	20.4	44808	914083
C38	OW	2007	sept	45.8523	5.76	M	N	20.4	44808	914083
C1	IW	2007	oct	58.4808	2.71	F	I	15.6	39441	615280
C2	IW	2007	oct	65.4483	3.3	F	I	15.6	39441	615280
C3	IW	2007	oct	28.6774	2.67	F	N	15.6	39441	615280
C4	IW	2007	oct	51.125	2.99	F	N	15.6	39441	615280
C5	IW	2007	oct	50.3448	3.31	M	N	15.6	39441	615280
C6	IW	2007	oct	30.9032	2.95	F	I	15.6	39441	615280
C7	IW	2007	oct	33.8	3.59	M	I	15.6	39441	615280
C8	IW	2007	oct	48.1	3.25	M	N	15.6	39441	615280
C9	IW	2007	oct	78.4167	4.18	M	I	15.6	39441	615280
C10	IW	2007	oct	47.4032	3.96	M	N	15.6	39441	615280
C11	IW	2007	oct	40.8548	2.19	F	I	15.6	39441	615280
C12	IW	2007	oct	46.3871	3.69	M	N	15.6	39441	615280
C13	IW	2007	oct	60.6452	2.95	F	N	15.6	39441	615280
C14	IW	2007	oct	46.6333	2.99	F	I	15.6	39441	615280
C15	IW	2007	oct	61.9516	3.78	F	N	15.6	39441	615280
C16	IW	2007	oct	54.0333	3.77	M	N	15.6	39441	615280
C17	IW	2007	oct	48.5667	3.57	M	N	15.6	39441	615280
C18	IW	2007	oct	47	4.43	F	I	15.6	39441	615280
C19	IW	2007	oct	116.328	3.66	F	N	15.6	39441	615280
C20	IW	2007	oct	66.95	3.72	F	I	15.6	39441	615280
C21	IW	2007	oct	44.8396	3.75	F	I	15.6	39441	615280
C22	IW	2007	oct	52.7895	3.69	F	N	15.6	39441	615280
C23	OW	2007	oct	58.3387	4.56	M	N	15.6	39441	615280
C24	OW	2007	oct	28.5227	3.69	F	I	15.6	39441	615280
C25	OW	2007	oct	71.2442	3.81	F	N	15.6	39441	615280
C26	OW	2007	oct	75.5288	3.89	F	I	15.6	39441	615280
C27	OW	2007	oct	53.1	3.6	F	N	15.6	39441	615280
C28	OW	2007	oct	39.2439	4.61	M	N	15.6	39441	615280
C29	OW	2007	oct	48.5806	3.77	F	I	15.6	39441	615280
C30	OW	2007	oct	65.8871	5.06	F	N	15.6	39441	615280
C31	OW	2007	oct	53.7167	4.65	M	N	15.6	39441	615280
C32	OW	2007	oct	120	4.53	M	N	15.6	39441	615280
C33	OW	2007	oct	60.3113	5.59	M	N	15.6	39441	615280
C34	OW	2007	oct	78.05	4.04	F	N	15.6	39441	615280
C35	OW	2007	oct	90.3871	9.2	M	N	15.6	39441	615280
C36	OW	2007	oct	24.7742	7.04	M	N	15.6	39441	615280
C37	OW	2007	oct	42.2667	8.28	M	N	15.6	39441	615280
C38	OW	2007	oct	48.2255	5.59	M	N	15.6	39441	615280
C1	IW	2007	nov	39.1207	2.49	F	I	10	34738	347380
C2	IW	2007	nov	53.8448	3.7	F	I	10	34738	347380
C3	IW	2007	nov	47.3167	2.46	F	N	10	34738	347380
C4	IW	2007	nov	35.4444	3.14	F	N	10	34738	347380
C5	IW	2007	nov	55.1167	3.56	M	N	10	34738	347380
C6	IW	2007	nov	48.7167	2.83	F	I	10	34738	347380
C7	IW	2007	nov	30.8704	3.86	M	I	10	34738	347380
C8	IW	2007	nov	55.3125	3.29	M	N	10	34738	347380
C9	IW	2007	nov	81.35	3.74	M	I	10	34738	347380
C10	IW	2007	nov	43.95	4.01	M	N	10	34738	347380
C11	IW	2007	nov	40.5	2.3	F	I	10	34738	347380
C12	IW	2007	nov	51.9167	3.44	M	N	10	34738	347380
C13	IW	2007	nov	78.0833	2.72	F	N	10	34738	347380
C14	IW	2007	nov	41.95	3.1	F	I	10	34738	347380
C15	IW	2007	nov	63.2759	3.88	F	N	10	34738	347380
C16	IW	2007	nov	94.7	3.73	M	N	10	34738	347380
C17	IW	2007	nov	44.0167	3.7	M	N	10	34738	347380
C18	IW	2007	nov	56.7167	4.1	F	I	10	34738	347380
C19	IW	2007	nov	114.69	3.64	F	N	10	34738	347380
C20	IW	2007	nov	57.5517	3.79	F	I	10	34738	347380
C21	IW	2007	nov	43.4697	3.51	F	I	10	34738	347380
C22	IW	2007	nov	47.9464	3.66	F	N	10	34738	347380
C23	OW	2007	nov	62.3333	4.35	M	N	10	34738	347380
C24	OW	2007	nov	34.625	3.53	F	I	10	34738	347380
C25	OW	2007	nov	43.431	3.72	F	N	10	34738	347380
C26	OW	2007	nov	43.5	3.85	F	I	10	34738	347380
C27	OW	2007	nov	48.537	3.65	F	N	10	34738	347380
C28	OW	2007	nov	35.2222	4.62	M	N	10	34738	347380
C29	OW	2007	nov	52.6667	3.62	F	I	10	34738	347380
C30	OW	2007	nov	62.3167	5.3	F	N	10	34738	347380
C31	OW	2007	nov	56.7167	4.76	M	N	10	34738	347380
C32	OW	2007	nov	106.4	4.56	M	N	10	34738	347380
C33	OW	2007	nov	58.7027	4.78	M	N	10	34738	347380
C34	OW	2007	nov	93.1167	3.89	F	N	10	34738	347380
C35	OW	2007	nov	93.0172	9.16	M	N	10	34738	347380
C36	OW	2007	nov	31.7321	7.22	M	N	10	34738	347380
C37	OW	2007	nov	37.1333	8.17	M	N	10	34738	347380
C38	OW	2007	nov	51.9	5.61	M	N	10	34738	347380
C1	IW	2007	dec	39.8793	2.67	F	I	7.2	32380	233136
C2	IW	2007	dec	47	3.87	F	I	7.2	32380	233136
C3	IW	2007	dec	50.9833	2.46	F	N	7.2	32380	233136
C4	IW	2007	dec	45.1786	3.3	F	N	7.2	32380	233136
C5	IW	2007	dec	44.5862	3.62	M	N	7.2	32380	233136
C6	IW	2007	dec	44.3167	2.87	F	I	7.2	32380	233136
C7	IW	2007	dec	31.8393	3.94	M	I	7.2	32380	233136
C8	IW	2007	dec	54.6333	3.4	M	N	7.2	32380	233136
C9	IW	2007	dec	60.6897	4.37	M	I	7.2	32380	233136
C10	IW	2007	dec	44.9833	4.03	M	N	7.2	32380	233136
C11	IW	2007	dec	35.75	2.3	F	I	7.2	32380	233136
C12	IW	2007	dec	59.4833	3.44	M	N	7.2	32380	233136
C13	IW	2007	dec	119.75	2.87	F	N	7.2	32380	233136
C14	IW	2007	dec	33.9333	3.1	F	I	7.2	32380	233136
C15	IW	2007	dec	62.25	4.05	F	N	7.2	32380	233136
C16	IW	2007	dec	70.8833	3.93	M	N	7.2	32380	233136
C17	IW	2007	dec	38.8833	3.73	M	N	7.2	32380	233136
C18	IW	2007	dec	55.3833	4.29	F	I	7.2	32380	233136
C19	IW	2007	dec	80.4821	3.77	F	N	7.2	32380	233136
C20	IW	2007	dec	50.65	3.97	F	I	7.2	32380	233136
C21	IW	2007	dec	50.1897	3.36	F	I	7.2	32380	233136
C22	IW	2007	dec	38.1724	3.72	F	N	7.2	32380	233136
C23	OW	2007	dec	68.5667	5.35	M	N	7.2	32380	233136
C24	OW	2007	dec	37.5625	3.52	F	I	7.2	32380	233136
C25	OW	2007	dec	20.0909	3.76	F	N	7.2	32380	233136
C26	OW	2007	dec	95.8621	3.3	F	I	7.2	32380	233136
C27	OW	2007	dec	42.0833	3.72	F	N	7.2	32380	233136
C28	OW	2007	dec	45.1379	4.46	M	N	7.2	32380	233136
C29	OW	2007	dec	57.5	3.62	F	I	7.2	32380	233136
C30	OW	2007	dec	61.3	5.27	F	N	7.2	32380	233136
C31	OW	2007	dec	46.6167	4.77	M	N	7.2	32380	233136
C32	OW	2007	dec	112.467	4.58	M	N	7.2	32380	233136
C33	OW	2007	dec	87.8833	4.5	M	N	7.2	32380	233136
C34	OW	2007	dec	66.5179	4.28	F	N	7.2	32380	233136
C35	OW	2007	dec	93.1333	9.12	M	N	7.2	32380	233136
C36	OW	2007	dec	31.8167	7.03	M	N	7.2	32380	233136
C37	OW	2007	dec	33.0833	8.12	M	N	7.2	32380	233136
C38	OW	2007	dec	68.1897	5.3	M	N	7.2	32380	233136
C1	IW	2008	Jan	35.7167	2.69	F	I	7.7	33751	259883
C2	IW	2008	Jan	42.4167	3.72	F	I	7.7	33751	259883
C3	IW	2008	Jan	40.25	2.57	F	N	7.7	33751	259883
C4	IW	2008	Jan	27.8393	3.28	F	N	7.7	33751	259883
C5	IW	2008	Jan	41.05	3.63	M	N	7.7	33751	259883
C6	IW	2008	Jan	91.9667	2.89	F	I	7.7	33751	259883
C7	IW	2008	Jan	74.25	3.74	M	I	7.7	33751	259883
C8	IW	2008	Jan	54.1136	3.46	M	N	7.7	33751	259883
C9	IW	2008	Jan	71.6167	4.2	M	I	7.7	33751	259883
C10	IW	2008	Jan	38.9333	3.95	M	N	7.7	33751	259883
C11	IW	2008	Jan	37.4667	2.3	F	I	7.7	33751	259883
C12	IW	2008	Jan	49.8333	3.5	M	N	7.7	33751	259883
C13	IW	2008	Jan	80.9833	3.01	F	N	7.7	33751	259883
C14	IW	2008	Jan	36.4	2.92	F	I	7.7	33751	259883
C15	IW	2008	Jan	58.45	4.09	F	N	7.7	33751	259883
C16	IW	2008	Jan	90.9828	3.85	M	N	7.7	33751	259883
C17	IW	2008	Jan	39.65	3.63	M	N	7.7	33751	259883
C18	IW	2008	Jan	52.3966	4.4	F	I	7.7	33751	259883
C19	IW	2008	Jan	87.1167	3.28	F	N	7.7	33751	259883
C20	IW	2008	Jan	55.1833	3.94	F	I	7.7	33751	259883
C21	IW	2008	Jan	58.1833	3.43	F	I	7.7	33751	259883
C22	IW	2008	Jan	43.3889	3.72	F	N	7.7	33751	259883
C23	OW	2008	Jan	65.4333	4.46	M	N	7.7	33751	259883
C24	OW	2008	Jan	43	3.6	F	I	7.7	33751	259883
C25	OW	2008	Jan	47	3.9	F	N	7.7	33751	259883
C26	OW	2008	Jan	104.167	3.55	F	I	7.7	33751	259883
C27	OW	2008	Jan	38.7	3.7	F	N	7.7	33751	259883
C28	OW	2008	Jan	73.4167	4.57	M	N	7.7	33751	259883
C29	OW	2008	Jan	55.6667	3.73	F	I	7.7	33751	259883
C30	OW	2008	Jan	49.6379	5.33	F	N	7.7	33751	259883
C31	OW	2008	Jan	41	4.75	M	N	7.7	33751	259883
C32	OW	2008	Jan	112.683	4.61	M	N	7.7	33751	259883
C33	OW	2008	Jan	87.4667	4.91	M	N	7.7	33751	259883
C34	OW	2008	Jan	88.8833	4.27	F	N	7.7	33751	259883
C35	OW	2008	Jan	103	9.27	M	N	7.7	33751	259883
C36	OW	2008	Jan	23	7.39	M	N	7.7	33751	259883
C37	OW	2008	Jan	20	8.07	M	N	7.7	33751	259883
C38	OW	2008	Jan	37.9333	5.7	M	N	7.7	33751	259883
C1	IW	2008	Feb	36.7581	2.86	F	I	6.6	37953	250490
C2	IW	2008	Feb	43.1034	3.48	F	I	6.6	37953	250490
C3	IW	2008	Feb	44.0968	2.6	F	N	6.6	37953	250490
C4	IW	2008	Feb	25.5952	3.27	F	N	6.6	37953	250490
C5	IW	2008	Feb	48.1935	3.35	M	N	6.6	37953	250490
C6	IW	2008	Feb	108.161	3.1	F	I	6.6	37953	250490
C7	IW	2008	Feb	74.6333	3.39	M	I	6.6	37953	250490
C8	IW	2008	Feb	53.1429	3.28	M	N	6.6	37953	250490
C9	IW	2008	Feb	83.6613	3.89	M	I	6.6	37953	250490
C10	IW	2008	Feb	54.4833	3.99	M	N	6.6	37953	250490
C11	IW	2008	Feb	38.0323	2.33	F	I	6.6	37953	250490
C12	IW	2008	Feb	40.7742	3.68	M	N	6.6	37953	250490
C13	IW	2008	Feb	74.629	3.08	F	N	6.6	37953	250490
C14	IW	2008	Feb	34.0323	2.87	F	I	6.6	37953	250490
C15	IW	2008	Feb	62.95	3.93	F	N	6.6	37953	250490
C16	IW	2008	Feb	109.2	3.91	M	N	6.6	37953	250490
C17	IW	2008	Feb	44.8548	3.41	M	N	6.6	37953	250490
C18	IW	2008	Feb	61.9667	4.34	F	I	6.6	37953	250490
C19	IW	2008	Feb	30.9464	3.78	F	N	6.6	37953	250490
C20	IW	2008	Feb	56.0806	3.82	F	I	6.6	37953	250490
C21	IW	2008	Feb	49.6774	3.54	F	I	6.6	37953	250490
C22	IW	2008	Feb	36.75	3.85	F	N	6.6	37953	250490
C23	OW	2008	Feb	71.1935	4.43	M	N	6.6	37953	250490
C24	OW	2008	Feb	43.75	3.6	F	I	6.6	37953	250490
C25	OW	2008	Feb	42	4.2	F	N	6.6	37953	250490
C26	OW	2008	Feb	118.742	3.89	F	I	6.6	37953	250490
C27	OW	2008	Feb	38.2258	3.72	F	N	6.6	37953	250490
C28	OW	2008	Feb	73.5806	4.28	M	N	6.6	37953	250490
C29	OW	2008	Feb	61.7097	3.79	F	I	6.6	37953	250490
C30	OW	2008	Feb	60.2759	5.37	F	N	6.6	37953	250490
C31	OW	2008	Feb	44.4677	4.72	M	N	6.6	37953	250490
C32	OW	2008	Feb	97.3387	4.55	M	N	6.6	37953	250490
C33	OW	2008	Feb	92.8	4.98	M	N	6.6	37953	250490
C34	OW	2008	Feb	80.4677	4.38	F	N	6.6	37953	250490
C35	OW	2008	Feb	101.5	9.38	M	N	6.6	37953	250490
C36	OW	2008	Feb	29.7037	7.35	M	N	6.6	37953	250490
C37	OW	2008	Feb	20	7.75	M	N	6.6	37953	250490
C38	OW	2008	Feb	39.2097	5.7	M	N	6.6	37953	250490
C1	IW	2008	March	34.15	2.73	F	I	11	43200	475200
C2	IW	2008	March	47.1964	3.41	F	I	11	43200	475200
C3	IW	2008	March	37.6333	2.6	F	N	11	43200	475200
C4	IW	2008	March	25.6136	3.2	F	N	11	43200	475200
C5	IW	2008	March	33.7857	3.22	M	N	11	43200	475200
C6	IW	2008	March	96.2833	3.26	F	I	11	43200	475200
C7	IW	2008	March	81.95	3.42	M	I	11	43200	475200
C8	IW	2008	March	36.3929	3.26	M	N	11	43200	475200
C9	IW	2008	March	74.7667	3.71	M	I	11	43200	475200
C10	IW	2008	March	33.8462	3.92	M	N	11	43200	475200
C11	IW	2008	March	36.45	2.37	F	I	11	43200	475200
C12	IW	2008	March	27.5	3.68	M	N	11	43200	475200
C13	IW	2008	March	64.7833	3.13	F	N	11	43200	475200
C14	IW	2008	March	36.3	3.02	F	I	11	43200	475200
C15	IW	2008	March	72.8833	3.85	F	N	11	43200	475200
C16	IW	2008	March	106.1	3.74	M	N	11	43200	475200
C17	IW	2008	March	46.9167	3.28	M	N	11	43200	475200
C18	IW	2008	March	53.5172	4.26	F	I	11	43200	475200
C19	IW	2008	March	22.96	3.7	F	N	11	43200	475200
C20	IW	2008	March	64.8621	3.53	F	I	11	43200	475200
C21	IW	2008	March	57.2833	3.7	F	I	11	43200	475200
C22	IW	2008	March	46.6154	3.79	F	N	11	43200	475200
C23	OW	2008	March	69.6167	4.52	M	N	11	43200	475200
C24	OW	2008	March	41.3833	3.72	F	I	11	43200	475200
C25	OW	2008	March	39.9833	4.1	F	N	11	43200	475200
C26	OW	2008	March	104.217	3.93	F	I	11	43200	475200
C27	OW	2008	March	36.2778	4.65	F	N	11	43200	475200
C28	OW	2008	March	76.4333	3.8	M	N	11	43200	475200
C29	OW	2008	March	51.4	3.82	F	I	11	43200	475200
C30	OW	2008	March	55.5167	5.35	F	N	11	43200	475200
C31	OW	2008	March	47.6	4.69	M	N	11	43200	475200
C32	OW	2008	March	124.967	4.52	M	N	11	43200	475200
C33	OW	2008	March	72.6167	4.8	M	N	11	43200	475200
C34	OW	2008	March	64.1481	3.36	F	N	11	43200	475200
C35	OW	2008	March	103.683	9.25	M	N	11	43200	475200
C36	OW	2008	March	29.7037	7.32	M	N	11	43200	475200
C37	OW	2008	March	20	7.79	M	N	11	43200	475200
C38	OW	2008	March	52.65	5.7	M	N	11	43200	475200
C1	IW	2008	April	43.6	2.8	F	I	12	48610	583320
C2	IW	2008	April	29.25	3.31	F	I	12	48610	583320
C3	IW	2008	April	40.1667	2.63	F	N	12	48610	583320
C4	IW	2008	April	69.7	3.1	F	N	12	48610	583320
C5	IW	2008	April	32.0833	3.11	M	N	12	48610	583320
C6	IW	2008	April	56.4167	3.1	F	I	12	48610	583320
C7	IW	2008	April	30	3.34	M	I	12	48610	583320
C8	IW	2008	April	20	3.23	M	N	12	48610	583320
C9	IW	2008	April	41.6724	3.67	M	I	12	48610	583320
C10	IW	2008	April	37.0862	3.86	M	N	12	48610	583320
C11	IW	2008	April	38.3333	2.23	F	I	12	48610	583320
C12	IW	2008	April	57.4333	3.68	M	N	12	48610	583320
C13	IW	2008	April	105.617	3.07	F	N	12	48610	583320
C14	IW	2008	April	33.8	3.82	F	I	12	48610	583320
C15	IW	2008	April	50.7	4.16	F	N	12	48610	583320
C16	IW	2008	April	71.8276	3.73	M	N	12	48610	583320
C17	IW	2008	April	35.1667	3.32	M	N	12	48610	583320
C18	IW	2008	April	49.4138	4.33	F	I	12	48610	583320
C19	IW	2008	April	45.3182	3.58	F	N	12	48610	583320
C20	IW	2008	April	50.5333	3.58	F	I	12	48610	583320
C21	IW	2008	April	51.8269	3.7	F	I	12	48610	583320
C22	IW	2008	April	31.4423	3.72	F	N	12	48610	583320
C23	OW	2008	April	62.6333	4.53	M	N	12	48610	583320
C24	OW	2008	April	31.7955	3.76	F	I	12	48610	583320
C25	OW	2008	April	21.4667	4.14	F	N	12	48610	583320
C26	OW	2008	April	95.1923	4.24	F	I	12	48610	583320
C27	OW	2008	April	43.8167	3.62	F	N	12	48610	583320
C28	OW	2008	April	40.58	3.89	M	N	12	48610	583320
C29	OW	2008	April	55.8167	3.82	F	I	12	48610	583320
C30	OW	2008	April	62.5667	5.35	F	N	12	48610	583320
C31	OW	2008	April	47.7833	4.6	M	N	12	48610	583320
C32	OW	2008	April	103.276	4.34	M	N	12	48610	583320
C33	OW	2008	April	80.25	4.8	M	N	12	48610	583320
C34	OW	2008	April	64.8929	5.25	F	N	12	48610	583320
C35	OW	2008	April	99.7586	9.31	M	N	12	48610	583320
C36	OW	2008	April	24.6111	7.35	M	N	12	48610	583320
C37	OW	2008	April	28.2931	7.85	M	N	12	48610	583320
C38	OW	2008	April	76.9231	5.97	M	N	12	48610	583320
C1	IW	2008	May	38.4107	2.86	F	I	17	53164	903788
C2	IW	2008	May	34.6786	3.41	F	I	17	53164	903788
C3	IW	2008	May	34.9286	2.59	F	N	17	53164	903788
C4	IW	2008	May	38.8	2.94	F	N	17	53164	903788
C5	IW	2008	May	24.7115	3.14	M	N	17	53164	903788
C6	IW	2008	May	79.2321	3.22	F	I	17	53164	903788
C7	IW	2008	May	30.7778	3.41	M	I	17	53164	903788
C8	IW	2008	May	20	3.23	M	N	17	53164	903788
C9	IW	2008	May	50.0179	3.59	M	I	17	53164	903788
C10	IW	2008	May	37.9821	3.96	M	N	17	53164	903788
C11	IW	2008	May	40.6964	2.26	F	I	17	53164	903788
C12	IW	2008	May	55.0357	3.23	M	N	17	53164	903788
C13	IW	2008	May	104.804	3.11	F	N	17	53164	903788
C14	IW	2008	May	42.25	2.82	F	I	17	53164	903788
C15	IW	2008	May	49.9815	4.2	F	N	17	53164	903788
C16	IW	2008	May	64.4821	3.79	M	N	17	53164	903788
C17	IW	2008	May	32.9074	3.31	M	N	17	53164	903788
C18	IW	2008	May	44.4107	4.44	F	I	17	53164	903788
C19	IW	2008	May	56.5652	3.4	F	N	17	53164	903788
C20	IW	2008	May	43.537	3.71	F	I	17	53164	903788
C21	IW	2008	May	71.6379	3.7	F	I	17	53164	903788
C22	IW	2008	May	38.4615	3.55	F	N	17	53164	903788
C23	OW	2008	May	73.2679	4.6	M	N	17	53164	903788
C24	OW	2008	May	50.8077	3.78	F	I	17	53164	903788
C25	OW	2008	May	53.4722	4.26	F	N	17	53164	903788
C26	OW	2008	May	101.02	4.14	F	I	17	53164	903788
C27	OW	2008	May	36.2143	3.53	F	N	17	53164	903788
C28	OW	2008	May	47.0769	4.18	M	N	17	53164	903788
C29	OW	2008	May	57.1964	3.94	F	I	17	53164	903788
C30	OW	2008	May	48.6071	5.25	F	N	17	53164	903788
C31	OW	2008	May	42.537	4.59	M	N	17	53164	903788
C32	OW	2008	May	117.482	4.48	M	N	17	53164	903788
C33	OW	2008	May	95.1852	4.87	M	N	17	53164	903788
C34	OW	2008	May	80.6607	4.85	F	N	17	53164	903788
C35	OW	2008	May	87.8036	9.68	M	N	17	53164	903788
C36	OW	2008	May	24.4815	6.99	M	N	17	53164	903788
C37	OW	2008	May	27.3148	8.07	M	N	17	53164	903788
C38	OW	2008	May	58.9643	6.11	M	N	17	53164	903788
C1	IW	2008	June	34.9	2.9	F	I	21	55402	1163442
C2	IW	2008	June	44.0517	3.41	F	I	21	55402	1163442
C3	IW	2008	June	40.45	2.7	F	N	21	55402	1163442
C4	IW	2008	June	21.125	2.9	F	N	21	55402	1163442
C5	IW	2008	June	36.7167	3.14	M	N	21	55402	1163442
C6	IW	2008	June	70.7833	3.14	F	I	21	55402	1163442
C7	IW	2008	June	47.4833	3.39	M	I	21	55402	1163442
C8	IW	2008	June	20	3.21	M	N	21	55402	1163442
C9	IW	2008	June	58.8167	3.61	M	I	21	55402	1163442
C10	IW	2008	June	36.9655	3.87	M	N	21	55402	1163442
C11	IW	2008	June	37.6167	2.35	F	I	21	55402	1163442
C12	IW	2008	June	54.3333	3.07	M	N	21	55402	1163442
C13	IW	2008	June	98.4	3.3	F	N	21	55402	1163442
C14	IW	2008	June	35.25	2.82	F	I	21	55402	1163442
C15	IW	2008	June	61.9667	4.85	F	N	21	55402	1163442
C16	IW	2008	June	64.5862	3.91	M	N	21	55402	1163442
C17	IW	2008	June	40	3.31	M	N	21	55402	1163442
C18	IW	2008	June	48.5606	4.49	F	I	21	55402	1163442
C19	IW	2008	June	109.117	3.43	F	N	21	55402	1163442
C20	IW	2008	June	42.5862	3.71	F	I	21	55402	1163442
C21	IW	2008	June	54.1	3.79	F	I	21	55402	1163442
C22	IW	2008	June	38.9815	3.5	F	N	21	55402	1163442
C23	OW	2008	June	69.75	4.75	M	N	21	55402	1163442
C24	OW	2008	June	47.9839	4.04	F	I	21	55402	1163442
C25	OW	2008	June	50	4.08	F	N	21	55402	1163442
C26	OW	2008	June	108.433	4.29	F	I	21	55402	1163442
C27	OW	2008	June	40.6833	3.5	F	N	21	55402	1163442
C28	OW	2008	June	50.95	4.43	M	N	21	55402	1163442
C29	OW	2008	June	53.3	3.92	F	I	21	55402	1163442
C30	OW	2008	June	52.75	5.34	F	N	21	55402	1163442
C31	OW	2008	June	42.2833	4.59	M	N	21	55402	1163442
C32	OW	2008	June	95	4.44	M	N	21	55402	1163442
C33	OW	2008	June	87.8571	4.93	M	N	21	55402	1163442
C34	OW	2008	June	104.033	4.85	F	N	21	55402	1163442
C35	OW	2008	June	95.9333	9.96	M	N	21	55402	1163442
C36	OW	2008	June	23.4615	7.24	M	N	21	55402	1163442
C37	OW	2008	June	20	8.07	M	N	21	55402	1163442
C38	OW	2008	June	39.7	6.41	M	N	21	55402	1163442
C1	IW	2008	July	30.4355	2.84	F	I	23	54103	1244369
C2	IW	2008	July	39.4516	3.22	F	I	23	54103	1244369
C3	IW	2008	July	33.3548	2.69	F	N	23	54103	1244369
C4	IW	2008	July	30.1429	3.03	F	N	23	54103	1244369
C5	IW	2008	July	24.371	3.23	M	N	23	54103	1244369
C6	IW	2008	July	125.726	3.16	F	I	23	54103	1244369
C7	IW	2008	July	75.129	3.59	M	I	23	54103	1244369
C8	IW	2008	July	21.55	3.25	M	N	23	54103	1244369
C9	IW	2008	July	81.3387	3.84	M	I	23	54103	1244369
C10	IW	2008	July	36.3036	3.88	M	N	23	54103	1244369
C11	IW	2008	July	34.6364	2.31	F	I	23	54103	1244369
C12	IW	2008	July	28.6579	3.63	M	N	23	54103	1244369
C13	IW	2008	July	81.7903	3.32	F	N	23	54103	1244369
C14	IW	2008	July	42.5484	2.9	F	I	23	54103	1244369
C15	IW	2008	July	36.4333	4.52	F	N	23	54103	1244369
C16	IW	2008	July	89.8548	3.85	M	N	23	54103	1244369
C17	IW	2008	July	43.0323	3.32	M	N	23	54103	1244369
C18	IW	2008	July	55.3448	4.59	F	I	23	54103	1244369
C19	IW	2008	July	34.9483	3.57	F	N	23	54103	1244369
C20	IW	2008	July	69.3226	3.72	F	I	23	54103	1244369
C21	IW	2008	July	41.9483	3.98	F	I	23	54103	1244369
C22	IW	2008	July	41.1613	3.69	F	N	23	54103	1244369
C23	OW	2008	July	59.825	4.15	M	N	23	54103	1244369
C24	OW	2008	July	40.7419	4.06	F	I	23	54103	1244369
C25	OW	2008	July	30.8793	4	F	N	23	54103	1244369
C26	OW	2008	July	90.569	4.25	F	I	23	54103	1244369
C27	OW	2008	July	32.7419	3.63	F	N	23	54103	1244369
C28	OW	2008	July	72.5345	4.5	M	N	23	54103	1244369
C29	OW	2008	July	50.2742	3.88	F	I	23	54103	1244369
C30	OW	2008	July	53.1129	5.4	F	N	23	54103	1244369
C31	OW	2008	July	48.0484	4.55	M	N	23	54103	1244369
C32	OW	2008	July	112.5	4.39	M	N	23	54103	1244369
C33	OW	2008	July	80.5517	4.92	M	N	23	54103	1244369
C34	OW	2008	July	49.5	5.2	F	N	23	54103	1244369
C35	OW	2008	July	96.9808	10.05	M	N	23	54103	1244369
C36	OW	2008	July	36.9259	7.34	M	N	23	54103	1244369
C37	OW	2008	July	20	8.39	M	N	23	54103	1244369
C38	OW	2008	July	53.7759	6.48	M	N	23	54103	1244369
C1	IW	2008	Aug	32.371	2.9	F	I	23	49997	1149931
C2	IW	2008	Aug	40.4167	3.26	F	I	23	49997	1149931
C3	IW	2008	Aug	30.6129	2.71	F	N	23	49997	1149931
C4	IW	2008	Aug	55.8333	3.04	F	N	23	49997	1149931
C5	IW	2008	Aug	29.3393	3.11	M	N	23	49997	1149931
C6	IW	2008	Aug	107.758	3.1	F	I	23	49997	1149931
C7	IW	2008	Aug	49.0806	3.6	M	I	23	49997	1149931
C8	IW	2008	Aug	20	3.3	M	N	23	49997	1149931
C9	IW	2008	Aug	74.0161	3.95	M	I	23	49997	1149931
C10	IW	2008	Aug	38.7581	3.95	M	N	23	49997	1149931
C11	IW	2008	Aug	38.4333	2.17	F	I	23	49997	1149931
C12	IW	2008	Aug	72.0323	3.22	M	N	23	49997	1149931
C13	IW	2008	Aug	79.129	3.29	F	N	23	49997	1149931
C14	IW	2008	Aug	34.2419	2.86	F	I	23	49997	1149931
C15	IW	2008	Aug	38.8871	4.03	F	N	23	49997	1149931
C16	IW	2008	Aug	102.371	3.9	M	N	23	49997	1149931
C17	IW	2008	Aug	45.0833	3.35	M	N	23	49997	1149931
C18	IW	2008	Aug	61.85	4.75	F	I	23	49997	1149931
C19	IW	2008	Aug	48.1111	3.59	F	N	23	49997	1149931
C20	IW	2008	Aug	59.3065	3.71	F	I	23	49997	1149931
C21	IW	2008	Aug	50.8387	3.77	F	I	23	49997	1149931
C22	IW	2008	Aug	36.2581	3.55	F	N	23	49997	1149931
C23	OW	2008	Aug	65	4.55	M	N	23	49997	1149931
C24	OW	2008	Aug	40.2581	4.08	F	I	23	49997	1149931
C25	OW	2008	Aug	32.129	4.06	F	N	23	49997	1149931
C26	OW	2008	Aug	66.2742	4.63	F	I	23	49997	1149931
C27	OW	2008	Aug	29.4032	3.67	F	N	23	49997	1149931
C28	OW	2008	Aug	45.3226	4.42	M	N	23	49997	1149931
C29	OW	2008	Aug	52.7903	3.92	F	I	23	49997	1149931
C30	OW	2008	Aug	69.4516	5.37	F	N	23	49997	1149931
C31	OW	2008	Aug	46.0806	4.49	M	N	23	49997	1149931
C32	OW	2008	Aug	92.4516	4.47	M	N	23	49997	1149931
C33	OW	2008	Aug	74.1452	4.99	M	N	23	49997	1149931
C34	OW	2008	Aug	48.0333	5.23	F	N	23	49997	1149931
C35	OW	2008	Aug	100.968	9.77	M	N	23	49997	1149931
C36	OW	2008	Aug	37.7903	7.33	M	N	23	49997	1149931
C37	OW	2008	Aug	21.3696	8.37	M	N	23	49997	1149931
C38	OW	2008	Aug	59.3077	6.44	M	N	23	49997	1149931
C1	IW	2008	sept	35.5345	2.91	F	I	18	44808	806544
C2	IW	2008	sept	46.0536	3.32	F	I	18	44808	806544
C3	IW	2008	sept	38.8	2.65	F	N	18	44808	806544
C4	IW	2008	sept	20.4706	3.1	F	N	18	44808	806544
C5	IW	2008	sept	41.2586	3.26	M	N	18	44808	806544
C6	IW	2008	sept	109.95	2.91	F	I	18	44808	806544
C7	IW	2008	sept	46.3667	3.59	M	I	18	44808	806544
C8	IW	2008	sept	20	3.34	M	N	18	44808	806544
C9	IW	2008	sept	75.0667	3.99	M	I	18	44808	806544
C10	IW	2008	sept	40.5333	3.92	M	N	18	44808	806544
C11	IW	2008	sept	60.9783	2.25	F	I	18	44808	806544
C12	IW	2008	sept	48.7167	3.36	M	N	18	44808	806544
C13	IW	2008	sept	76.05	3.32	F	N	18	44808	806544
C14	IW	2008	sept	37.45	2.84	F	I	18	44808	806544
C15	IW	2008	sept	43.8333	3.96	F	N	18	44808	806544
C16	IW	2008	sept	92	3.93	M	N	18	44808	806544
C17	IW	2008	sept	49.5333	3.36	M	N	18	44808	806544
C18	IW	2008	sept	46.4833	4.55	F	I	18	44808	806544
C19	IW	2008	sept	58.8333	3.7	F	N	18	44808	806544
C20	IW	2008	sept	69.3	3.84	F	I	18	44808	806544
C21	IW	2008	sept	32.6786	4.09	F	I	18	44808	806544
C22	IW	2008	sept	40.5893	3.63	F	N	18	44808	806544
C23	OW	2008	sept	40.2931	4.63	M	N	18	44808	806544
C24	OW	2008	sept	37.6167	4.18	F	I	18	44808	806544
C25	OW	2008	sept	35.7037	3.96	F	N	18	44808	806544
C26	OW	2008	sept	54	4.4	F	I	18	44808	806544
C27	OW	2008	sept	40.0167	3.69	F	N	18	44808	806544
C28	OW	2008	sept	38.7321	4.45	M	N	18	44808	806544
C29	OW	2008	sept	53.5333	3.87	F	I	18	44808	806544
C30	OW	2008	sept	64.9	5.39	F	N	18	44808	806544
C31	OW	2008	sept	52.65	4.6	M	N	18	44808	806544
C32	OW	2008	sept	100.667	4.46	M	N	18	44808	806544
C33	OW	2008	sept	83.2143	5.01	M	N	18	44808	806544
C34	OW	2008	sept	67.6167	5.28	F	N	18	44808	806544
C35	OW	2008	sept	104.017	9.96	M	N	18	44808	806544
C36	OW	2008	sept	43.6364	7.27	M	N	18	44808	806544
C37	OW	2008	sept	34.2407	8.43	M	N	18	44808	806544
C38	OW	2008	sept	41.3393	6.8	M	N	18	44808	806544
C1	IW	2008	oct	45.0833	2.94	F	I	14	39441	552174
C2	IW	2008	oct	54.2581	3.56	F	I	14	39441	552174
C3	IW	2008	oct	34.3387	2.65	F	N	14	39441	552174
C4	IW	2008	oct	29.537	3.2	F	N	14	39441	552174
C5	IW	2008	oct	30.9	3.45	M	N	14	39441	552174
C6	IW	2008	oct	127.145	2.86	F	I	14	39441	552174
C7	IW	2008	oct	51.0161	3.73	M	I	14	39441	552174
C8	IW	2008	oct	25.4828	3.35	M	N	14	39441	552174
C9	IW	2008	oct	88.8548	4.21	M	I	14	39441	552174
C10	IW	2008	oct	54.6667	4.08	M	N	14	39441	552174
C11	IW	2008	oct	44.2414	2.24	F	I	14	39441	552174
C12	IW	2008	oct	46.8393	3.37	M	N	14	39441	552174
C13	IW	2008	oct	94.4667	3.28	F	N	14	39441	552174
C14	IW	2008	oct	35.6935	2.93	F	I	14	39441	552174
C15	IW	2008	oct	48.3065	3.89	F	N	14	39441	552174
C16	IW	2008	oct	103.824	3.97	M	N	14	39441	552174
C17	IW	2008	oct	57.5	3.66	M	N	14	39441	552174
C18	IW	2008	oct	47	4.43	F	I	14	39441	552174
C19	IW	2008	oct	97.5833	3.74	F	N	14	39441	552174
C20	IW	2008	oct	70.1129	3.82	F	I	14	39441	552174
C21	IW	2008	oct	27	3.97	F	I	14	39441	552174
C22	IW	2008	oct	29.0517	3.6	F	N	14	39441	552174
C23	OW	2008	oct	63.6613	4.61	M	N	14	39441	552174
C24	OW	2008	oct	47.6935	4.18	F	I	14	39441	552174
C25	OW	2008	oct	54.0323	3.99	F	N	14	39441	552174
C26	OW	2008	oct	31.5323	4.13	F	I	14	39441	552174
C27	OW	2008	oct	33.85	3.6	F	N	14	39441	552174
C28	OW	2008	oct	49.5323	4.31	M	N	14	39441	552174
C29	OW	2008	oct	47.129	3.79	F	I	14	39441	552174
C30	OW	2008	oct	61.2419	5.5	F	N	14	39441	552174
C31	OW	2008	oct	48.9839	4.69	M	N	14	39441	552174
C32	OW	2008	oct	95.129	4.53	M	N	14	39441	552174
C33	OW	2008	oct	83.2581	5.03	M	N	14	39441	552174
C34	OW	2008	oct	71.7097	5.25	F	N	14	39441	552174
C35	OW	2008	oct	94.6129	9.88	M	N	14	39441	552174
C36	OW	2008	oct	59.0938	7.23	M	N	14	39441	552174
C37	OW	2008	oct	24.9483	8.38	M	N	14	39441	552174
C38	OW	2008	oct	27.371	6.38	M	N	14	39441	552174
C1	IW	2008	nov	100.733	2.68	F	I	9	34738	312642
C2	IW	2008	nov	51.5172	3.74	F	I	9	34738	312642
C3	IW	2008	nov	34.6667	2.49	F	N	9	34738	312642
C4	IW	2008	nov	44.6	3.2	F	N	9	34738	312642
C5	IW	2008	nov	47.1034	3.4	M	N	9	34738	312642
C6	IW	2008	nov	40.3621	2.84	F	I	9	34738	312642
C7	IW	2008	nov	52.6538	3.94	M	I	9	34738	312642
C8	IW	2008	nov	26.5333	3.35	M	N	9	34738	312642
C9	IW	2008	nov	64.05	4.26	M	I	9	34738	312642
C10	IW	2008	nov	62.4	4.03	M	N	9	34738	312642
C11	IW	2008	nov	54.2759	2.2	F	I	9	34738	312642
C12	IW	2008	nov	44.2647	3.18	M	N	9	34738	312642
C13	IW	2008	nov	36.1552	2.94	F	N	9	34738	312642
C14	IW	2008	nov	35.1	2.94	F	I	9	34738	312642
C15	IW	2008	nov	49.8333	3.98	F	N	9	34738	312642
C16	IW	2008	nov	76.9	3.78	M	N	9	34738	312642
C17	IW	2008	nov	55.3103	3.72	M	N	9	34738	312642
C18	IW	2008	nov	56.7167	4.1	F	I	9	34738	312642
C19	IW	2008	nov	86.5192	3.71	F	N	9	34738	312642
C20	IW	2008	nov	51.2833	3.82	F	I	9	34738	312642
C21	IW	2008	nov	31.9138	3.81	F	I	9	34738	312642
C22	IW	2008	nov	26.1739	3.54	F	N	9	34738	312642
C23	OW	2008	nov	40.3148	3.92	M	N	9	34738	312642
C24	OW	2008	nov	41.1167	3.85	F	I	9	34738	312642
C25	OW	2008	nov	40.7778	3.64	F	N	9	34738	312642
C26	OW	2008	nov	32.8966	3.51	F	I	9	34738	312642
C27	OW	2008	nov	29.3	3.67	F	N	9	34738	312642
C28	OW	2008	nov	54.1724	4.14	M	N	9	34738	312642
C29	OW	2008	nov	47.7333	3.58	F	I	9	34738	312642
C30	OW	2008	nov	57.5167	5.47	F	N	9	34738	312642
C31	OW	2008	nov	59.7333	4.62	M	N	9	34738	312642
C32	OW	2008	nov	85.6333	4.37	M	N	9	34738	312642
C33	OW	2008	nov	98.0517	4.73	M	N	9	34738	312642
C34	OW	2008	nov	39.5167	5.17	F	N	9	34738	312642
C35	OW	2008	nov	91.0167	10	M	N	9	34738	312642
C36	OW	2008	nov	58.05	7.27	M	N	9	34738	312642
C37	OW	2008	nov	23.6607	8.33	M	N	9	34738	312642
C38	OW	2008	nov	41.1429	5.84	M	N	9	34738	312642
C1	IW	2008	dec	105.052	2.68	F	I	6	32380	194280
C2	IW	2008	dec	52.569	3.74	F	I	6	32380	194280
C3	IW	2008	dec	47.7241	2.49	F	N	6	32380	194280
C4	IW	2008	dec	46.2167	3.2	F	N	6	32380	194280
C5	IW	2008	dec	39.9667	3.4	M	N	6	32380	194280
C6	IW	2008	dec	51.0167	2.84	F	I	6	32380	194280
C7	IW	2008	dec	77.05	3.94	M	I	6	32380	194280
C8	IW	2008	dec	33.2586	3.35	M	N	6	32380	194280
C9	IW	2008	dec	68.7833	4.26	M	I	6	32380	194280
C10	IW	2008	dec	52.8966	4.03	M	N	6	32380	194280
C11	IW	2008	dec	127.95	2.2	F	I	6	32380	194280
C12	IW	2008	dec	65.8333	3.18	M	N	6	32380	194280
C13	IW	2008	dec	42.8667	2.94	F	N	6	32380	194280
C14	IW	2008	dec	35.25	2.94	F	I	6	32380	194280
C15	IW	2008	dec	65.4821	3.98	F	N	6	32380	194280
C16	IW	2008	dec	55.25	3.78	M	N	6	32380	194280
C17	IW	2008	dec	51.2333	3.72	M	N	6	32380	194280
C18	IW	2008	dec	55.3833	4.29	F	I	6	32380	194280
C19	IW	2008	dec	64.9286	3.71	F	N	6	32380	194280
C20	IW	2008	dec	63.45	3.9	F	I	6	32380	194280
C21	IW	2008	dec	46.4167	3.4	F	I	6	32380	194280
C22	IW	2008	dec	31.2857	3.54	F	N	6	32380	194280
C23	OW	2008	dec	45	3.92	M	N	6	32380	194280
C24	OW	2008	dec	35.8667	3.85	F	I	6	32380	194280
C25	OW	2008	dec	77.7833	3.64	F	N	6	32380	194280
C26	OW	2008	dec	54.6333	3.51	F	I	6	32380	194280
C27	OW	2008	dec	42.3793	3.67	F	N	6	32380	194280
C28	OW	2008	dec	79.3103	4.14	M	N	6	32380	194280
C29	OW	2008	dec	71.25	3.58	F	I	6	32380	194280
C30	OW	2008	dec	50.3333	5.35	F	N	6	32380	194280
C31	OW	2008	dec	64.8333	4.62	M	N	6	32380	194280
C32	OW	2008	dec	87.7679	4.37	M	N	6	32380	194280
C33	OW	2008	dec	69.0345	4.73	M	N	6	32380	194280
C34	OW	2008	dec	56.3167	5.17	F	N	6	32380	194280
C35	OW	2008	dec	59.0417	10	M	N	6	32380	194280
C36	OW	2008	dec	78.931	7.27	M	N	6	32380	194280
C37	OW	2008	dec	47.0667	8.33	M	N	6	32380	194280
C38	OW	2008	dec	89.5167	5.84	M	N	6	32380	194280
C1	IW	2009	Jan	64.9423	2.78	F	I	4	33751	135004
C2	IW	2009	Jan	45.7222	3.68	F	I	4	33751	135004
C3	IW	2009	Jan	42.4833	2.6	F	N	4	33751	135004
C4	IW	2009	Jan	53.5192	3.25	F	N	4	33751	135004
C5	IW	2009	Jan	48.0333	3.49	M	N	4	33751	135004
C6	IW	2009	Jan	44.5333	2.99	F	I	4	33751	135004
C7	IW	2009	Jan	57	3.42	M	I	4	33751	135004
C8	IW	2009	Jan	57.125	3.25	M	N	4	33751	135004
C9	IW	2009	Jan	63.6296	4.02	M	I	4	33751	135004
C10	IW	2009	Jan	46.4833	4.03	M	N	4	33751	135004
C11	IW	2009	Jan	49.85	2.26	F	I	4	33751	135004
C12	IW	2009	Jan	67.7167	3.4	M	N	4	33751	135004
C13	IW	2009	Jan	43.8462	3.22	F	N	4	33751	135004
C14	IW	2009	Jan	49.6	2.85	F	I	4	33751	135004
C15	IW	2009	Jan	54.5	4	F	N	4	33751	135004
C16	IW	2009	Jan	63.4038	4.15	M	N	4	33751	135004
C17	IW	2009	Jan	40	3.53	M	N	4	33751	135004
C18	IW	2009	Jan	61.7667	4.59	F	I	4	33751	135004
C19	IW	2009	Jan	56.3462	3.69	F	N	4	33751	135004
C20	IW	2009	Jan	52.5167	3.84	F	I	4	33751	135004
C21	IW	2009	Jan	46.8	3.42	F	I	4	33751	135004
C22	IW	2009	Jan	61.2222	3.72	F	N	4	33751	135004
C23	OW	2009	Jan	52.8793	3.93	M	N	4	33751	135004
C24	OW	2009	Jan	31.7955	3.91	F	I	4	33751	135004
C25	OW	2009	Jan	49.6552	4.2	F	N	4	33751	135004
C26	OW	2009	Jan	67.7321	4.1	F	I	4	33751	135004
C27	OW	2009	Jan	47.18	3.62	F	N	4	33751	135004
C28	OW	2009	Jan	56.5345	4.34	M	N	4	33751	135004
C29	OW	2009	Jan	69.35	3.94	F	I	4	33751	135004
C30	OW	2009	Jan	43.84	4.94	F	N	4	33751	135004
C31	OW	2009	Jan	51.55	4.71	M	N	4	33751	135004
C32	OW	2009	Jan	70.2667	4.65	M	N	4	33751	135004
C33	OW	2009	Jan	62.1034	5.07	M	N	4	33751	135004
C34	OW	2009	Jan	69.86	4.8	F	N	4	33751	135004
C35	OW	2009	Jan	77.0167	9.45	M	N	4	33751	135004
C36	OW	2009	Jan	84.0833	7.59	M	N	4	33751	135004
C37	OW	2009	Jan	73.431	8.16	M	N	4	33751	135004
C38	OW	2009	Jan	89.8966	6.3	M	N	4	33751	135004
C1	IW	2009	Feb	42.3077	2.78	F	I	7	37953	265671
C2	IW	2009	Feb	37.5652	3.68	F	I	7	37953	265671
C3	IW	2009	Feb	43.0769	2.6	F	N	7	37953	265671
C4	IW	2009	Feb	45.8077	3.25	F	N	7	37953	265671
C5	IW	2009	Feb	30.6087	3.49	M	N	7	37953	265671
C6	IW	2009	Feb	59.8462	2.99	F	I	7	37953	265671
C7	IW	2009	Feb	59.8125	3.42	M	I	7	37953	265671
C8	IW	2009	Feb	58.46	3.25	M	N	7	37953	265671
C9	IW	2009	Feb	68.9615	4.02	M	I	7	37953	265671
C10	IW	2009	Feb	42.6923	4.03	M	N	7	37953	265671
C11	IW	2009	Feb	45.25	2.26	F	I	7	37953	265671
C12	IW	2009	Feb	59.0577	3.4	M	N	7	37953	265671
C13	IW	2009	Feb	41.2115	3.22	F	N	7	37953	265671
C14	IW	2009	Feb	26.2222	2.85	F	I	7	37953	265671
C15	IW	2009	Feb	57.5192	4	F	N	7	37953	265671
C16	IW	2009	Feb	60.0385	4.15	M	N	7	37953	265671
C17	IW	2009	Feb	36.6522	3.53	M	N	7	37953	265671
C18	IW	2009	Feb	66.1731	4.59	F	I	7	37953	265671
C19	IW	2009	Feb	61.6731	3.69	F	N	7	37953	265671
C20	IW	2009	Feb	39.6765	3.84	F	I	7	37953	265671
C21	IW	2009	Feb	51.4808	3.42	F	I	7	37953	265671
C22	IW	2009	Feb	63.4423	3.72	F	N	7	37953	265671
C23	OW	2009	Feb	80.4231	3.93	M	N	7	37953	265671
C24	OW	2009	Feb	50.8077	3.91	F	I	7	37953	265671
C25	OW	2009	Feb	45.9615	4.2	F	N	7	37953	265671
C26	OW	2009	Feb	66.1875	4.1	F	I	7	37953	265671
C27	OW	2009	Feb	44.9808	3.62	F	N	7	37953	265671
C28	OW	2009	Feb	67.8654	4.34	M	N	7	37953	265671
C29	OW	2009	Feb	64.1538	3.94	F	I	7	37953	265671
C30	OW	2009	Feb	51.88	4.94	F	N	7	37953	265671
C31	OW	2009	Feb	43.5455	4.71	M	N	7	37953	265671
C32	OW	2009	Feb	57.9423	4.65	M	N	7	37953	265671
C33	OW	2009	Feb	79.5	5.07	M	N	7	37953	265671
C34	OW	2009	Feb	69.9423	4.8	F	N	7	37953	265671
C35	OW	2009	Feb	94.6346	9.45	M	N	7	37953	265671
C36	OW	2009	Feb	79.4231	7.59	M	N	7	37953	265671
C37	OW	2009	Feb	70.5962	8.16	M	N	7	37953	265671
C38	OW	2009	Feb	76.5	6.3	M	N	7	37953	265671
C1	IW	2009	March	39.871	2.88	F	I	11	43200	475200
C2	IW	2009	March	45.1613	3.49	F	I	11	43200	475200
C3	IW	2009	March	38.9194	2.64	F	N	11	43200	475200
C4	IW	2009	March	44.85	3.25	F	N	11	43200	475200
C5	IW	2009	March	44.7097	3.16	M	N	11	43200	475200
C6	IW	2009	March	53.6935	3.36	F	I	11	43200	475200
C7	IW	2009	March	61.3387	3.42	M	I	11	43200	475200
C8	IW	2009	March	45.5806	3.48	M	N	11	43200	475200
C9	IW	2009	March	58.5667	4.02	M	I	11	43200	475200
C10	IW	2009	March	43.2903	3.98	M	N	11	43200	475200
C11	IW	2009	March	46.9839	2.29	F	I	11	43200	475200
C12	IW	2009	March	60.7903	3.45	M	N	11	43200	475200
C13	IW	2009	March	35.7742	3.27	F	N	11	43200	475200
C14	IW	2009	March	49.0952	2.85	F	I	11	43200	475200
C15	IW	2009	March	73.4839	4	F	N	11	43200	475200
C16	IW	2009	March	49.9839	4.1	M	N	11	43200	475200
C17	IW	2009	March	44.5806	3.52	M	N	11	43200	475200
C18	IW	2009	March	64.9194	4.59	F	I	11	43200	475200
C19	IW	2009	March	64.1613	3.69	F	N	11	43200	475200
C20	IW	2009	March	57.037	2.79	F	I	11	43200	475200
C21	IW	2009	March	65.7258	3.62	F	I	11	43200	475200
C22	IW	2009	March	61.5806	3.72	F	N	11	43200	475200
C23	OW	2009	March	75.9032	4.16	M	N	11	43200	475200
C24	OW	2009	March	47.9839	4.02	F	I	11	43200	475200
C25	OW	2009	March	48.5645	3.9	F	N	11	43200	475200
C26	OW	2009	March	52.371	3.86	F	I	11	43200	475200
C27	OW	2009	March	44.0484	3.62	F	N	11	43200	475200
C28	OW	2009	March	74.6774	4.51	M	N	11	43200	475200
C29	OW	2009	March	62.7742	3.9	F	I	11	43200	475200
C30	OW	2009	March	51.1129	4.94	F	N	11	43200	475200
C31	OW	2009	March	42.6786	4.49	M	N	11	43200	475200
C32	OW	2009	March	55.7097	4.63	M	N	11	43200	475200
C33	OW	2009	March	72.5167	5.04	M	N	11	43200	475200
C34	OW	2009	March	66.7742	4.88	F	N	11	43200	475200
C35	OW	2009	March	100.71	9.45	M	N	11	43200	475200
C36	OW	2009	March	72.5323	7.59	M	N	11	43200	475200
C37	OW	2009	March	65.4355	8.16	M	N	11	43200	475200
C38	OW	2009	March	61.1129	6.41	M	N	11	43200	475200
C1	IW	2009	April	27.9833	2.88	F	I	13	48610	631930
C2	IW	2009	April	47.25	3.49	F	I	13	48610	631930
C3	IW	2009	April	33	2.75	F	N	13	48610	631930
C4	IW	2009	April	49.1935	3.25	F	N	13	48610	631930
C5	IW	2009	April	50.0167	3.26	M	N	13	48610	631930
C6	IW	2009	April	30.5667	3.41	F	I	13	48610	631930
C7	IW	2009	April	73.8065	3.42	M	I	13	48610	631930
C8	IW	2009	April	55.1207	3.48	M	N	13	48610	631930
C9	IW	2009	April	61.5161	4.02	M	I	13	48610	631930
C10	IW	2009	April	30	4.08	M	N	13	48610	631930
C11	IW	2009	April	36.7419	2.43	F	I	13	48610	631930
C12	IW	2009	April	39.629	3.54	M	N	13	48610	631930
C13	IW	2009	April	26.7333	3.15	F	N	13	48610	631930
C14	IW	2009	April	34.7419	3.13	F	I	13	48610	631930
C15	IW	2009	April	52.8226	4.63	F	N	13	48610	631930
C16	IW	2009	April	66.5968	3.88	M	N	13	48610	631930
C17	IW	2009	April	36.8548	3.5	M	N	13	48610	631930
C18	IW	2009	April	51.8167	4.9	F	I	13	48610	631930
C19	IW	2009	April	44.95	3.69	F	N	13	48610	631930
C20	IW	2009	April	45.5	3.52	F	I	13	48610	631930
C21	IW	2009	April	33.2581	3.78	F	I	13	48610	631930
C22	IW	2009	April	50.6129	3.72	F	N	13	48610	631930
C23	OW	2009	April	48.129	4.48	M	N	13	48610	631930
C24	OW	2009	April	47.6935	4.03	F	I	13	48610	631930
C25	OW	2009	April	48.4516	3.85	F	N	13	48610	631930
C26	OW	2009	April	53.7419	3.92	F	I	13	48610	631930
C27	OW	2009	April	36.3387	3.62	F	N	13	48610	631930
C28	OW	2009	April	29.3387	4.71	M	N	13	48610	631930
C29	OW	2009	April	46.4516	3.98	F	I	13	48610	631930
C30	OW	2009	April	68.9032	4.88	F	N	13	48610	631930
C31	OW	2009	April	52.4667	4.66	M	N	13	48610	631930
C32	OW	2009	April	54.9833	4.62	M	N	13	48610	631930
C33	OW	2009	April	58.1833	5.2	M	N	13	48610	631930
C34	OW	2009	April	66.9	4.88	F	N	13	48610	631930
C35	OW	2009	April	102.355	9.77	M	N	13	48610	631930
C36	OW	2009	April	80.0968	7.5	M	N	13	48610	631930
C37	OW	2009	April	67.4667	8.1	M	N	13	48610	631930
C38	OW	2009	April	52.7143	6.46	M	N	13	48610	631930
C1	IW	2009	May	28.6833	2.92	F	I	18	53164	956952
C2	IW	2009	May	46.1552	3.35	F	I	18	53164	956952
C3	IW	2009	May	48.5769	2.76	F	N	18	53164	956952
C4	IW	2009	May	45.6	3.25	F	N	18	53164	956952
C5	IW	2009	May	33.5	3.35	M	N	18	53164	956952
C6	IW	2009	May	36.3667	3.29	F	I	18	53164	956952
C7	IW	2009	May	76.1	3.42	M	I	18	53164	956952
C8	IW	2009	May	59.5833	3.28	M	N	18	53164	956952
C9	IW	2009	May	69.5556	4.02	M	I	18	53164	956952
C10	IW	2009	May	35	3.78	M	N	18	53164	956952
C11	IW	2009	May	39.8667	2.32	F	I	18	53164	956952
C12	IW	2009	May	42.5833	3.33	M	N	18	53164	956952
C13	IW	2009	May	33.8333	3.16	F	N	18	53164	956952
C14	IW	2009	May	38.05	2.97	F	I	18	53164	956952
C15	IW	2009	May	59.5	4.51	F	N	18	53164	956952
C16	IW	2009	May	65.6667	3.89	M	N	18	53164	956952
C17	IW	2009	May	44.1167	3.64	M	N	18	53164	956952
C18	IW	2009	May	53.7586	4.9	F	I	18	53164	956952
C19	IW	2009	May	31.3103	3.69	F	N	18	53164	956952
C20	IW	2009	May	48.85	3.7	F	I	18	53164	956952
C21	IW	2009	May	31.9167	3.95	F	I	18	53164	956952
C22	IW	2009	May	49.5833	3.72	F	N	18	53164	956952
C23	OW	2009	May	50.7333	4.48	M	N	18	53164	956952
C24	OW	2009	May	41.1167	4.03	F	I	18	53164	956952
C25	OW	2009	May	59.2759	3.9	F	N	18	53164	956952
C26	OW	2009	May	61.9333	3.92	F	I	18	53164	956952
C27	OW	2009	May	42.8	3.62	F	N	18	53164	956952
C28	OW	2009	May	21.1667	4.94	M	N	18	53164	956952
C29	OW	2009	May	51.4667	4.01	F	I	18	53164	956952
C30	OW	2009	May	71.0517	5.44	F	N	18	53164	956952
C31	OW	2009	May	57.2	4.6	M	N	18	53164	956952
C32	OW	2009	May	62.1833	4.6	M	N	18	53164	956952
C33	OW	2009	May	56.8333	5.14	M	N	18	53164	956952
C34	OW	2009	May	76.1333	4.88	F	N	18	53164	956952
C35	OW	2009	May	90.45	10.02	M	N	18	53164	956952
C36	OW	2009	May	81.4333	7.57	M	N	18	53164	956952
C37	OW	2009	May	71.0333	8.2	M	N	18	53164	956952
C38	OW	2009	May	80.9833	6.63	M	N	18	53164	956952
C1	IW	2009	June	35.6562	2.93	F	I	22	55402	1218844
C2	IW	2009	June	34.3333	3.27	F	I	22	55402	1218844
C3	IW	2009	June	54.6897	2.8	F	N	22	55402	1218844
C4	IW	2009	June	45.8	3.07	F	N	22	55402	1218844
C5	IW	2009	June	40.4483	3.47	M	N	22	55402	1218844
C6	IW	2009	June	40.1333	3.35	F	I	22	55402	1218844
C7	IW	2009	June	59.8833	3.72	M	I	22	55402	1218844
C8	IW	2009	June	69.6667	3.47	M	N	22	55402	1218844
C9	IW	2009	June	56.9333	3.53	M	I	22	55402	1218844
C10	IW	2009	June	40.6957	3.85	M	N	22	55402	1218844
C11	IW	2009	June	39.2931	2.37	F	I	22	55402	1218844
C12	IW	2009	June	51.0172	3.4	M	N	22	55402	1218844
C13	IW	2009	June	26.913	3.06	F	N	22	55402	1218844
C14	IW	2009	June	38.7826	3.1	F	I	22	55402	1218844
C15	IW	2009	June	62.0862	4.9	F	N	22	55402	1218844
C16	IW	2009	June	70.1333	3.6	M	N	22	55402	1218844
C17	IW	2009	June	41.0385	3.68	M	N	22	55402	1218844
C18	IW	2009	June	47.85	5.07	F	I	22	55402	1218844
C19	IW	2009	June	41.125	3.63	F	N	22	55402	1218844
C20	IW	2009	June	39.6724	3.85	F	I	22	55402	1218844
C21	IW	2009	June	38.8333	3.98	F	I	22	55402	1218844
C22	IW	2009	June	54.3036	3.76	F	N	22	55402	1218844
C23	OW	2009	June	62.85	4.31	M	N	22	55402	1218844
C24	OW	2009	June	35.8667	4.01	F	I	22	55402	1218844
C25	OW	2009	June	52.5714	3.87	F	N	22	55402	1218844
C26	OW	2009	June	49.3333	4.12	F	I	22	55402	1218844
C27	OW	2009	June	44.2167	3.65	F	N	22	55402	1218844
C28	OW	2009	June	40.3966	4.94	M	N	22	55402	1218844
C29	OW	2009	June	69.7833	4.02	F	I	22	55402	1218844
C30	OW	2009	June	80.1167	5.63	F	N	22	55402	1218844
C31	OW	2009	June	51.9138	4.66	M	N	22	55402	1218844
C32	OW	2009	June	56.2	4.61	M	N	22	55402	1218844
C33	OW	2009	June	84.8258	5.09	M	N	22	55402	1218844
C34	OW	2009	June	85.0167	4.9	F	N	22	55402	1218844
C35	OW	2009	June	86.569	9.95	M	N	22	55402	1218844
C36	OW	2009	June	76.4	7.65	M	N	22	55402	1218844
C37	OW	2009	June	74.6333	8.37	M	N	22	55402	1218844
C38	OW	2009	June	70.5928	6.4	M	N	22	55402	1218844
C1	IW	2009	July	38.871	2.87	F	I	25	54103	1352575
C2	IW	2009	July	36.5172	2.85	F	I	25	54103	1352575
C3	IW	2009	July	37.9516	2.82	F	N	25	54103	1352575
C4	IW	2009	July	45.4677	3.16	F	N	25	54103	1352575
C5	IW	2009	July	39.95	3.33	M	N	25	54103	1352575
C6	IW	2009	July	35.9677	3.26	F	I	25	54103	1352575
C7	IW	2009	July	53.2742	3.71	M	I	25	54103	1352575
C8	IW	2009	July	52.5	3.5	M	N	25	54103	1352575
C9	IW	2009	July	61.0645	3.64	M	I	25	54103	1352575
C10	IW	2009	July	36.371	3.82	M	N	25	54103	1352575
C11	IW	2009	July	26.3704	2.37	F	I	25	54103	1352575
C12	IW	2009	July	40.2097	3.5	M	N	25	54103	1352575
C13	IW	2009	July	26.1613	3	F	N	25	54103	1352575
C14	IW	2009	July	37.7097	3.02	F	I	25	54103	1352575
C15	IW	2009	July	40.4677	4.42	F	N	25	54103	1352575
C16	IW	2009	July	45.4821	3.19	M	N	25	54103	1352575
C17	IW	2009	July	46.3387	3.71	M	N	25	54103	1352575
C18	IW	2009	July	58.4677	5.07	F	I	25	54103	1352575
C19	IW	2009	July	44.1935	3.62	F	N	25	54103	1352575
C20	IW	2009	July	54.8226	3.73	F	I	25	54103	1352575
C21	IW	2009	July	48.1818	4.01	F	I	25	54103	1352575
C22	IW	2009	July	44.8387	3.63	F	N	25	54103	1352575
C23	OW	2009	July	59.7258	4.31	M	N	25	54103	1352575
C24	OW	2009	July	40.7419	4.01	F	I	25	54103	1352575
C25	OW	2009	July	46.6129	3.75	F	N	25	54103	1352575
C26	OW	2009	July	35.5323	3.9	F	I	25	54103	1352575
C27	OW	2009	July	35.7833	3.58	F	N	25	54103	1352575
C28	OW	2009	July	43.2727	4.88	M	N	25	54103	1352575
C29	OW	2009	July	50.629	4.02	F	I	25	54103	1352575
C30	OW	2009	July	63.6452	5.6	F	N	25	54103	1352575
C31	OW	2009	July	37.6613	4.61	M	N	25	54103	1352575
C32	OW	2009	July	56.1333	4.53	M	N	25	54103	1352575
C33	OW	2009	July	107.7	5.02	M	N	25	54103	1352575
C34	OW	2009	July	61.9032	4.94	F	N	25	54103	1352575
C35	OW	2009	July	100.226	10.04	M	N	25	54103	1352575
C36	OW	2009	July	73.3065	7.55	M	N	25	54103	1352575
C37	OW	2009	July	70.6935	8.35	M	N	25	54103	1352575
C38	OW	2009	July	65.7419	6.32	M	N	25	54103	1352575
C1	IW	2009	Aug	26.1167	2.84	F	I	25	49997	1249925
C2	IW	2009	Aug	49.6935	3.16	F	I	25	49997	1249925
C3	IW	2009	Aug	30.9032	2.7	F	N	25	49997	1249925
C4	IW	2009	Aug	44.9839	3.16	F	N	25	49997	1249925
C5	IW	2009	Aug	45.7258	3.43	M	N	25	49997	1249925
C6	IW	2009	Aug	37.0161	3.28	F	I	25	49997	1249925
C7	IW	2009	Aug	51.7742	3.7	M	I	25	49997	1249925
C8	IW	2009	Aug	53.9355	3.52	M	N	25	49997	1249925
C9	IW	2009	Aug	65.7097	3.76	M	I	25	49997	1249925
C10	IW	2009	Aug	38.6774	3.69	M	N	25	49997	1249925
C11	IW	2009	Aug	31.3226	2.19	F	I	25	49997	1249925
C12	IW	2009	Aug	43.2258	3.25	M	N	25	49997	1249925
C13	IW	2009	Aug	29.4677	2.91	F	N	25	49997	1249925
C14	IW	2009	Aug	30.9677	2.87	F	I	25	49997	1249925
C15	IW	2009	Aug	42.0323	4.2	F	N	25	49997	1249925
C16	IW	2009	Aug	69.0833	3.59	M	N	25	49997	1249925
C17	IW	2009	Aug	46.2903	3.84	M	N	25	49997	1249925
C18	IW	2009	Aug	49.4516	5.01	F	I	25	49997	1249925
C19	IW	2009	Aug	44.6452	3.64	F	N	25	49997	1249925
C20	IW	2009	Aug	48.6613	3.83	F	I	25	49997	1249925
C21	IW	2009	Aug	58.5323	3.98	F	I	25	49997	1249925
C22	IW	2009	Aug	46.8833	3.67	F	N	25	49997	1249925
C23	OW	2009	Aug	61.8871	4.58	M	N	25	49997	1249925
C24	OW	2009	Aug	40.2581	4.08	F	I	25	49997	1249925
C25	OW	2009	Aug	39.3871	3.7	F	N	25	49997	1249925
C26	OW	2009	Aug	25.6667	3.6	F	I	25	49997	1249925
C27	OW	2009	Aug	30.8548	3.56	F	N	25	49997	1249925
C28	OW	2009	Aug	29.3548	4.9	M	N	25	49997	1249925
C29	OW	2009	Aug	46.7742	3.95	F	I	25	49997	1249925
C30	OW	2009	Aug	63.9839	5.72	F	N	25	49997	1249925
C31	OW	2009	Aug	43.9516	4.71	M	N	25	49997	1249925
C32	OW	2009	Aug	50.371	4.57	M	N	25	49997	1249925
C33	OW	2009	Aug	103.387	4.99	M	N	25	49997	1249925
C34	OW	2009	Aug	57.0645	4.9	F	N	25	49997	1249925
C35	OW	2009	Aug	94	10.2	M	N	25	49997	1249925
C36	OW	2009	Aug	67.1774	7.59	M	N	25	49997	1249925
C37	OW	2009	Aug	69.9677	8.39	M	N	25	49997	1249925
C38	OW	2009	Aug	66.5484	6.35	M	N	25	49997	1249925
C1	IW	2009	sept	37.5167	2.81	F	I	21	44808	940968
C2	IW	2009	sept	50.0167	3.43	F	I	21	44808	940968
C3	IW	2009	sept	32.4167	2.73	F	N	21	44808	940968
C4	IW	2009	sept	45.5333	3.22	F	N	21	44808	940968
C5	IW	2009	sept	53.3833	3.46	M	N	21	44808	940968
C6	IW	2009	sept	28.7167	3.11	F	I	21	44808	940968
C7	IW	2009	sept	82.6667	3.4	M	I	21	44808	940968
C8	IW	2009	sept	54.25	3.54	M	N	21	44808	940968
C9	IW	2009	sept	62.2167	3.8	M	I	21	44808	940968
C10	IW	2009	sept	22.5333	3.47	M	N	21	44808	940968
C11	IW	2009	sept	40.8333	2.22	F	I	21	44808	940968
C12	IW	2009	sept	47.25	3.3	M	N	21	44808	940968
C13	IW	2009	sept	32.6	2.83	F	N	21	44808	940968
C14	IW	2009	sept	39.55	2.93	F	I	21	44808	940968
C15	IW	2009	sept	46.2333	4.02	F	N	21	44808	940968
C16	IW	2009	sept	67.7931	3.66	M	N	21	44808	940968
C17	IW	2009	sept	47.65	3.79	M	N	21	44808	940968
C18	IW	2009	sept	52	4.88	F	I	21	44808	940968
C19	IW	2009	sept	52.45	3.59	F	N	21	44808	940968
C20	IW	2009	sept	52.2167	3.88	F	I	21	44808	940968
C21	IW	2009	sept	33.0926	4.04	F	I	21	44808	940968
C22	IW	2009	sept	48.6667	3.53	F	N	21	44808	940968
C23	OW	2009	sept	60.7333	4.7	M	N	21	44808	940968
C24	OW	2009	sept	37.6167	4.03	F	I	21	44808	940968
C25	OW	2009	sept	46.4333	3.6	F	N	21	44808	940968
C26	OW	2009	sept	50.3	3.35	F	I	21	44808	940968
C27	OW	2009	sept	42.0833	3.48	F	N	21	44808	940968
C28	OW	2009	sept	21.3	4.96	M	N	21	44808	940968
C29	OW	2009	sept	52.2321	3.93	F	I	21	44808	940968
C30	OW	2009	sept	65.2667	5.72	F	N	21	44808	940968
C31	OW	2009	sept	52.0833	4.66	M	N	21	44808	940968
C32	OW	2009	sept	52.1167	4.48	M	N	21	44808	940968
C33	OW	2009	sept	104.093	5.03	M	N	21	44808	940968
C34	OW	2009	sept	69.7	4.22	F	N	21	44808	940968
C35	OW	2009	sept	100.25	10.06	M	N	21	44808	940968
C36	OW	2009	sept	74.6333	7.63	M	N	21	44808	940968
C37	OW	2009	sept	63.2333	8.35	M	N	21	44808	940968
C38	OW	2009	sept	72.7222	6.32	M	N	21	44808	940968
C1	IW	2009	oct	38.32	2.85	F	I	15	39441	591615
C2	IW	2009	oct	37.28	3.47	F	I	15	39441	591615
C3	IW	2009	oct	41.7292	2.68	F	N	15	39441	591615
C4	IW	2009	oct	43.88	3.4	F	N	15	39441	591615
C5	IW	2009	oct	44.34	3.6	M	N	15	39441	591615
C6	IW	2009	oct	41.9	2.93	F	I	15	39441	591615
C7	IW	2009	oct	63.44	3.71	M	I	15	39441	591615
C8	IW	2009	oct	48.1	3.66	M	N	15	39441	591615
C9	IW	2009	oct	69.88	3.98	M	I	15	39441	591615
C10	IW	2009	oct	39.8	3.47	M	N	15	39441	591615
C11	IW	2009	oct	45.6875	2.34	F	I	15	39441	591615
C12	IW	2009	oct	53.28	3.2	M	N	15	39441	591615
C13	IW	2009	oct	34.44	2.6	F	N	15	39441	591615
C14	IW	2009	oct	51.3	2.97	F	I	15	39441	591615
C15	IW	2009	oct	85.54	3.95	F	N	15	39441	591615
C16	IW	2009	oct	56.66	3.7	M	N	15	39441	591615
C17	IW	2009	oct	46.94	3.83	M	N	15	39441	591615
C18	IW	2009	oct	68.62	4.9	F	I	15	39441	591615
C19	IW	2009	oct	62.18	3.72	F	N	15	39441	591615
C20	IW	2009	oct	65.72	4.04	F	I	15	39441	591615
C21	IW	2009	oct	56.4615	3.66	F	I	15	39441	591615
C22	IW	2009	oct	65.5	3.65	F	N	15	39441	591615
C23	OW	2009	oct	69.68	4.62	M	N	15	39441	591615
C24	OW	2009	oct	43	4.03	F	I	15	39441	591615
C25	OW	2009	oct	57.08	3.59	F	N	15	39441	591615
C26	OW	2009	oct	65.22	3.61	F	I	15	39441	591615
C27	OW	2009	oct	41.82	3.56	F	N	15	39441	591615
C28	OW	2009	oct	70.4	4.92	M	N	15	39441	591615
C29	OW	2009	oct	56.9	3.81	F	I	15	39441	591615
C30	OW	2009	oct	65.56	5.92	F	N	15	39441	591615
C31	OW	2009	oct	43.72	4.85	M	N	15	39441	591615
C32	OW	2009	oct	50.38	4.4	M	N	15	39441	591615
C33	OW	2009	oct	105.942	5.03	M	N	15	39441	591615
C34	OW	2009	oct	78.58	4.91	F	N	15	39441	591615
C35	OW	2009	oct	115.94	10.12	M	N	15	39441	591615
C36	OW	2009	oct	82.94	7.9	M	N	15	39441	591615
C37	OW	2009	oct	65.04	8.33	M	N	15	39441	591615
C38	OW	2009	oct	69.9423	6.15	M	N	15	39441	591615
C1	IW	2009	nov	51.0312	2.82	F	I	12	34738	416856
C2	IW	2009	nov	46.3125	3.17	F	I	12	34738	416856
C3	IW	2009	nov	38.375	2.67	F	N	12	34738	416856
C4	IW	2009	nov	46.625	3.48	F	N	12	34738	416856
C5	IW	2009	nov	46.875	3.57	M	N	12	34738	416856
C6	IW	2009	nov	55.9062	2.9	F	I	12	34738	416856
C7	IW	2009	nov	66.5625	4.11	M	I	12	34738	416856
C8	IW	2009	nov	55.3125	3.66	M	N	12	34738	416856
C9	IW	2009	nov	76.125	4.05	M	I	12	34738	416856
C10	IW	2009	nov	46.9062	3.47	M	N	12	34738	416856
C11	IW	2009	nov	43.1875	2.27	F	I	12	34738	416856
C12	IW	2009	nov	65.625	3.18	M	N	12	34738	416856
C13	IW	2009	nov	30.75	2.57	F	N	12	34738	416856
C14	IW	2009	nov	48.2812	2.92	F	I	12	34738	416856
C15	IW	2009	nov	82.0312	3.95	F	N	12	34738	416856
C16	IW	2009	nov	52	3.89	M	N	12	34738	416856
C17	IW	2009	nov	51.0312	3.68	M	N	12	34738	416856
C18	IW	2009	nov	62.3438	4.59	F	I	12	34738	416856
C19	IW	2009	nov	55.625	3.63	F	N	12	34738	416856
C20	IW	2009	nov	55.7188	3.94	F	I	12	34738	416856
C21	IW	2009	nov	65.2333	3.53	F	I	12	34738	416856
C22	IW	2009	nov	62.3438	3.68	F	N	12	34738	416856
C23	OW	2009	nov	69.5	4.35	M	N	12	34738	416856
C24	OW	2009	nov	43.75	4.01	F	I	12	34738	416856
C25	OW	2009	nov	52.7812	3.7	F	N	12	34738	416856
C26	OW	2009	nov	57.75	3.7	F	I	12	34738	416856
C27	OW	2009	nov	43.875	3.61	F	N	12	34738	416856
C28	OW	2009	nov	51.25	5.07	M	N	12	34738	416856
C29	OW	2009	nov	54.6875	3.52	F	I	12	34738	416856
C30	OW	2009	nov	74.2812	6.17	F	N	12	34738	416856
C31	OW	2009	nov	46.7812	4.95	M	N	12	34738	416856
C32	OW	2009	nov	60.4062	4.48	M	N	12	34738	416856
C33	OW	2009	nov	115.933	5	M	N	12	34738	416856
C34	OW	2009	nov	69.4062	4.97	F	N	12	34738	416856
C35	OW	2009	nov	106.219	10	M	N	12	34738	416856
C36	OW	2009	nov	79.4062	7.85	M	N	12	34738	416856
C37	OW	2009	nov	76.9062	8.35	M	N	12	34738	416856
C38	OW	2009	nov	65.7333	6.17	M	N	12	34738	416856
C1	IW	2009	dec	41.6207	2.87	F	I	7	32380	226660
C2	IW	2009	dec	36.7	3.17	F	I	7	32380	226660
C3	IW	2009	dec	37.1833	2.39	F	N	7	32380	226660
C4	IW	2009	dec	40.9	3.34	F	N	7	32380	226660
C5	IW	2009	dec	42.3333	3.4	M	N	7	32380	226660
C6	IW	2009	dec	43.6833	2.78	F	I	7	32380	226660
C7	IW	2009	dec	64.1833	4	M	I	7	32380	226660
C8	IW	2009	dec	54.6333	3.6	M	N	7	32380	226660
C9	IW	2009	dec	57.2333	4.12	M	I	7	32380	226660
C10	IW	2009	dec	43.5667	3.47	M	N	7	32380	226660
C11	IW	2009	dec	38.15	2.34	F	I	7	32380	226660
C12	IW	2009	dec	50.55	2.9	M	N	7	32380	226660
C13	IW	2009	dec	32.9333	2.54	F	N	7	32380	226660
C14	IW	2009	dec	32.8833	2.62	F	I	7	32380	226660
C15	IW	2009	dec	68.0667	3.8	F	N	7	32380	226660
C16	IW	2009	dec	42.8448	3.9	M	N	7	32380	226660
C17	IW	2009	dec	52.8333	3.76	M	N	7	32380	226660
C18	IW	2009	dec	57.7333	4.59	F	I	7	32380	226660
C19	IW	2009	dec	44.9	3.54	F	N	7	32380	226660
C20	IW	2009	dec	56.5333	3.86	F	I	7	32380	226660
C21	IW	2009	dec	54.6333	3.4	F	I	7	32380	226660
C22	IW	2009	dec	51.9667	3.46	F	N	7	32380	226660
C23	OW	2009	dec	64.0357	4.37	M	N	7	32380	226660
C24	OW	2009	dec	41.3833	4.04	F	I	7	32380	226660
C25	OW	2009	dec	53.6833	3.59	F	N	7	32380	226660
C26	OW	2009	dec	59.2586	3.87	F	I	7	32380	226660
C27	OW	2009	dec	34.5333	3.59	F	N	7	32380	226660
C28	OW	2009	dec	58.6833	5.12	M	N	7	32380	226660
C29	OW	2009	dec	49.9167	3.77	F	I	7	32380	226660
C30	OW	2009	dec	68.9828	6.28	F	N	7	32380	226660
C31	OW	2009	dec	54.7333	4.92	M	N	7	32380	226660
C32	OW	2009	dec	55.85	4.32	M	N	7	32380	226660
C33	OW	2009	dec	106.1	5.05	M	N	7	32380	226660
C34	OW	2009	dec	64.7833	5	F	N	7	32380	226660
C35	OW	2009	dec	88.5833	10.1	M	N	7	32380	226660
C36	OW	2009	dec	78.7333	7.78	M	N	7	32380	226660
C37	OW	2009	dec	75.45	8.35	M	N	7	32380	226660
C38	OW	2009	dec	62.5333	6.45	M	N	7	32380	226660

## Sheet: Feuil2
Annee	Tmoy	Lum
A006	5.9	33751
A006	5.9	33751
A006	5.9	33751
A006	5.9	33751
A006	5.9	33751
A006	5.9	33751
A006	5.9	33751
A006	5.9	33751
A006	5.9	33751
A006	5.9	33751
A006	5.9	33751
A006	5.9	33751
A006	5.9	33751
A006	5.9	33751
A006	5.9	33751
A006	5.9	33751
A006	5.9	33751
A006	5.9	33751
A006	5.9	33751
A006	5.9	33751
A006	5.9	33751
A006	5.9	33751
A006	5.9	33751
A006	5.9	33751
A006	5.9	33751
A006	5.9	33751
A006	5.9	33751
A006	5.9	33751
A006	5.9	33751
A006	5.9	33751
A006	5.9	33751
A006	5.9	33751
A006	5.9	33751
A006	5.9	33751
A006	5.9	33751
A006	5.9	33751
A006	5.9	33751
A006	5.9	33751
A006	6.6	37953
A006	6.6	37953
A006	6.6	37953
A006	6.6	37953
A006	6.6	37953
A006	6.6	37953
A006	6.6	37953
A006	6.6	37953
A006	6.6	37953
A006	6.6	37953
A006	6.6	37953
A006	6.6	37953
A006	6.6	37953
A006	6.6	37953
A006	6.6	37953
A006	6.6	37953
A006	6.6	37953
A006	6.6	37953
A006	6.6	37953
A006	6.6	37953
A006	6.6	37953
A006	6.6	37953
A006	6.6	37953
A006	6.6	37953
A006	6.6	37953
A006	6.6	37953
A006	6.6	37953
A006	6.6	37953
A006	6.6	37953
A006	6.6	37953
A006	6.6	37953
A006	6.6	37953
A006	6.6	37953
A006	6.6	37953
A006	6.6	37953
A006	6.6	37953
A006	6.6	37953
A006	6.6	37953
A006	10.5	43200
A006	10.5	43200
A006	10.5	43200
A006	10.5	43200
A006	10.5	43200
A006	10.5	43200
A006	10.5	43200
A006	10.5	43200
A006	10.5	43200
A006	10.5	43200
A006	10.5	43200
A006	10.5	43200
A006	10.5	43200
A006	10.5	43200
A006	10.5	43200
A006	10.5	43200
A006	10.5	43200
A006	10.5	43200
A006	10.5	43200
A006	10.5	43200
A006	10.5	43200
A006	10.5	43200
A006	10.5	43200
A006	10.5	43200
A006	10.5	43200
A006	10.5	43200
A006	10.5	43200
A006	10.5	43200
A006	10.5	43200
A006	10.5	43200
A006	10.5	43200
A006	10.5	43200
A006	10.5	43200
A006	10.5	43200
A006	10.5	43200
A006	10.5	43200
A006	10.5	43200
A006	10.5	43200
A006	15.1	48610
A006	15.1	48610
A006	15.1	48610
A006	15.1	48610
A006	15.1	48610
A006	15.1	48610
A006	15.1	48610
A006	15.1	48610
A006	15.1	48610
A006	15.1	48610
A006	15.1	48610
A006	15.1	48610
A006	15.1	48610
A006	15.1	48610
A006	15.1	48610
A006	15.1	48610
A006	15.1	48610
A006	15.1	48610
A006	15.1	48610
A006	15.1	48610
A006	15.1	48610
A006	15.1	48610
A006	15.1	48610
A006	15.1	48610
A006	15.1	48610
A006	15.1	48610
A006	15.1	48610
A006	15.1	48610
A006	15.1	48610
A006	15.1	48610
A006	15.1	48610
A006	15.1	48610
A006	15.1	48610
A006	15.1	48610
A006	15.1	48610
A006	15.1	48610
A006	15.1	48610
A006	15.1	48610
A006	18.5	53164
A006	18.5	53164
A006	18.5	53164
A006	18.5	53164
A006	18.5	53164
A006	18.5	53164
A006	18.5	53164
A006	18.5	53164
A006	18.5	53164
A006	18.5	53164
A006	18.5	53164
A006	18.5	53164
A006	18.5	53164
A006	18.5	53164
A006	18.5	53164
A006	18.5	53164
A006	18.5	53164
A006	18.5	53164
A006	18.5	53164
A006	18.5	53164
A006	18.5	53164
A006	18.5	53164
A006	18.5	53164
A006	18.5	53164
A006	18.5	53164
A006	18.5	53164
A006	18.5	53164
A006	18.5	53164
A006	18.5	53164
A006	18.5	53164
A006	18.5	53164
A006	18.5	53164
A006	18.5	53164
A006	18.5	53164
A006	18.5	53164
A006	18.5	53164
A006	18.5	53164
A006	18.5	53164
A006	22.9	55402
A006	22.9	55402
A006	22.9	55402
A006	22.9	55402
A006	22.9	55402
A006	22.9	55402
A006	22.9	55402
A006	22.9	55402
A006	22.9	55402
A006	22.9	55402
A006	22.9	55402
A006	22.9	55402
A006	22.9	55402
A006	22.9	55402
A006	22.9	55402
A006	22.9	55402
A006	22.9	55402
A006	22.9	55402
A006	22.9	55402
A006	22.9	55402
A006	22.9	55402
A006	22.9	55402
A006	22.9	55402
A006	22.9	55402
A006	22.9	55402
A006	22.9	55402
A006	22.9	55402
A006	22.9	55402
A006	22.9	55402
A006	22.9	55402
A006	22.9	55402
A006	22.9	55402
A006	22.9	55402
A006	22.9	55402
A006	22.9	55402
A006	22.9	55402
A006	22.9	55402
A006	22.9	55402
A006	28.5	54103
A006	28.5	54103
A006	28.5	54103
A006	28.5	54103
A006	28.5	54103
A006	28.5	54103
A006	28.5	54103
A006	28.5	54103
A006	28.5	54103
A006	28.5	54103
A006	28.5	54103
A006	28.5	54103
A006	28.5	54103
A006	28.5	54103
A006	28.5	54103
A006	28.5	54103
A006	28.5	54103
A006	28.5	54103
A006	28.5	54103
A006	28.5	54103
A006	28.5	54103
A006	28.5	54103
A006	28.5	54103
A006	28.5	54103
A006	28.5	54103
A006	28.5	54103
A006	28.5	54103
A006	28.5	54103
A006	28.5	54103
A006	28.5	54103
A006	28.5	54103
A006	28.5	54103
A006	28.5	54103
A006	28.5	54103
A006	28.5	54103
A006	28.5	54103
A006	28.5	54103
A006	28.5	54103
A006	23.1	49997
A006	23.1	49997
A006	23.1	49997
A006	23.1	49997
A006	23.1	49997
A006	23.1	49997
A006	23.1	49997
A006	23.1	49997
A006	23.1	49997
A006	23.1	49997
A006	23.1	49997
A006	23.1	49997
A006	23.1	49997
A006	23.1	49997
A006	23.1	49997
A006	23.1	49997
A006	23.1	49997
A006	23.1	49997
A006	23.1	49997
A006	23.1	49997
A006	23.1	49997
A006	23.1	49997
A006	23.1	49997
A006	23.1	49997
A006	23.1	49997
A006	23.1	49997
A006	23.1	49997
A006	23.1	49997
A006	23.1	49997
A006	23.1	49997
A006	23.1	49997
A006	23.1	49997
A006	23.1	49997
A006	23.1	49997
A006	23.1	49997
A006	23.1	49997
A006	23.1	49997
A006	23.1	49997
A006	21.6	44808
A006	21.6	44808
A006	21.6	44808
A006	21.6	44808
A006	21.6	44808
A006	21.6	44808
A006	21.6	44808
A006	21.6	44808
A006	21.6	44808
A006	21.6	44808
A006	21.6	44808
A006	21.6	44808
A006	21.6	44808
A006	21.6	44808
A006	21.6	44808
A006	21.6	44808
A006	21.6	44808
A006	21.6	44808
A006	21.6	44808
A006	21.6	44808
A006	21.6	44808
A006	21.6	44808
A006	21.6	44808
A006	21.6	44808
A006	21.6	44808
A006	21.6	44808
A006	21.6	44808
A006	21.6	44808
A006	21.6	44808
A006	21.6	44808
A006	21.6	44808
A006	21.6	44808
A006	21.6	44808
A006	21.6	44808
A006	21.6	44808
A006	21.6	44808
A006	21.6	44808
A006	21.6	44808
A006	18.3	39441
A006	18.3	39441
A006	18.3	39441
A006	18.3	39441
A006	18.3	39441
A006	18.3	39441
A006	18.3	39441
A006	18.3	39441
A006	18.3	39441
A006	18.3	39441
A006	18.3	39441
A006	18.3	39441
A006	18.3	39441
A006	18.3	39441
A006	18.3	39441
A006	18.3	39441
A006	18.3	39441
A006	18.3	39441
A006	18.3	39441
A006	18.3	39441
A006	18.3	39441
A006	18.3	39441
A006	18.3	39441
A006	18.3	39441
A006	18.3	39441
A006	18.3	39441
A006	18.3	39441
A006	18.3	39441
A006	18.3	39441
A006	18.3	39441
A006	18.3	39441
A006	18.3	39441
A006	18.3	39441
A006	18.3	39441
A006	18.3	39441
A006	18.3	39441
A006	18.3	39441
A006	18.3	39441
A006	13.1	34738
A006	13.1	34738
A006	13.1	34738
A006	13.1	34738
A006	13.1	34738
A006	13.1	34738
A006	13.1	34738
A006	13.1	34738
A006	13.1	34738
A006	13.1	34738
A006	13.1	34738
A006	13.1	34738
A006	13.1	34738
A006	13.1	34738
A006	13.1	34738
A006	13.1	34738
A006	13.1	34738
A006	13.1	34738
A006	13.1	34738
A006	13.1	34738
A006	13.1	34738
A006	13.1	34738
A006	13.1	34738
A006	13.1	34738
A006	13.1	34738
A006	13.1	34738
A006	13.1	34738
A006	13.1	34738
A006	13.1	34738
A006	13.1	34738
A006	13.1	34738
A006	13.1	34738
A006	13.1	34738
A006	13.1	34738
A006	13.1	34738
A006	13.1	34738
A006	13.1	34738
A006	13.1	34738
A006	7.8	32380
A006	7.8	32380
A006	7.8	32380
A006	7.8	32380
A006	7.8	32380
A006	7.8	32380
A006	7.8	32380
A006	7.8	32380
A006	7.8	32380
A006	7.8	32380
A006	7.8	32380
A006	7.8	32380
A006	7.8	32380
A006	7.8	32380
A006	7.8	32380
A006	7.8	32380
A006	7.8	32380
A006	7.8	32380
A006	7.8	32380
A006	7.8	32380
A006	7.8	32380
A006	7.8	32380
A006	7.8	32380
A006	7.8	32380
A006	7.8	32380
A006	7.8	32380
A006	7.8	32380
A006	7.8	32380
A006	7.8	32380
A006	7.8	32380
A006	7.8	32380
A006	7.8	32380
A006	7.8	32380
A006	7.8	32380
A006	7.8	32380
A006	7.8	32380
A006	7.8	32380
A006	7.8	32380
A007	9.3	33751
A007	9.3	33751
A007	9.3	33751
A007	9.3	33751
A007	9.3	33751
A007	9.3	33751
A007	9.3	33751
A007	9.3	33751
A007	9.3	33751
A007	9.3	33751
A007	9.3	33751
A007	9.3	33751
A007	9.3	33751
A007	9.3	33751
A007	9.3	33751
A007	9.3	33751
A007	9.3	33751
A007	9.3	33751
A007	9.3	33751
A007	9.3	33751
A007	9.3	33751
A007	9.3	33751
A007	9.3	33751
A007	9.3	33751
A007	9.3	33751
A007	9.3	33751
A007	9.3	33751
A007	9.3	33751
A007	9.3	33751
A007	9.3	33751
A007	9.3	33751
A007	9.3	33751
A007	9.3	33751
A007	9.3	33751
A007	9.3	33751
A007	9.3	33751
A007	9.3	33751
A007	9.3	33751
A007	9.6	37953
A007	9.6	37953
A007	9.6	37953
A007	9.6	37953
A007	9.6	37953
A007	9.6	37953
A007	9.6	37953
A007	9.6	37953
A007	9.6	37953
A007	9.6	37953
A007	9.6	37953
A007	9.6	37953
A007	9.6	37953
A007	9.6	37953
A007	9.6	37953
A007	9.6	37953
A007	9.6	37953
A007	9.6	37953
A007	9.6	37953
A007	9.6	37953
A007	9.6	37953
A007	9.6	37953
A007	9.6	37953
A007	9.6	37953
A007	9.6	37953
A007	9.6	37953
A007	9.6	37953
A007	9.6	37953
A007	9.6	37953
A007	9.6	37953
A007	9.6	37953
A007	9.6	37953
A007	9.6	37953
A007	9.6	37953
A007	9.6	37953
A007	9.6	37953
A007	9.6	37953
A007	9.6	37953
A007	11.6	43200
A007	11.6	43200
A007	11.6	43200
A007	11.6	43200
A007	11.6	43200
A007	11.6	43200
A007	11.6	43200
A007	11.6	43200
A007	11.6	43200
A007	11.6	43200
A007	11.6	43200
A007	11.6	43200
A007	11.6	43200
A007	11.6	43200
A007	11.6	43200
A007	11.6	43200
A007	11.6	43200
A007	11.6	43200
A007	11.6	43200
A007	11.6	43200
A007	11.6	43200
A007	11.6	43200
A007	11.6	43200
A007	11.6	43200
A007	11.6	43200
A007	11.6	43200
A007	11.6	43200
A007	11.6	43200
A007	11.6	43200
A007	11.6	43200
A007	11.6	43200
A007	11.6	43200
A007	11.6	43200
A007	11.6	43200
A007	11.6	43200
A007	11.6	43200
A007	11.6	43200
A007	11.6	43200
A007	17	48610
A007	17	48610
A007	17	48610
A007	17	48610
A007	17	48610
A007	17	48610
A007	17	48610
A007	17	48610
A007	17	48610
A007	17	48610
A007	17	48610
A007	17	48610
A007	17	48610
A007	17	48610
A007	17	48610
A007	17	48610
A007	17	48610
A007	17	48610
A007	17	48610
A007	17	48610
A007	17	48610
A007	17	48610
A007	17	48610
A007	17	48610
A007	17	48610
A007	17	48610
A007	17	48610
A007	17	48610
A007	17	48610
A007	17	48610
A007	17	48610
A007	17	48610
A007	17	48610
A007	17	48610
A007	17	48610
A007	17	48610
A007	17	48610
A007	17	48610
A007	19	53164
A007	19	53164
A007	19	53164
A007	19	53164
A007	19	53164
A007	19	53164
A007	19	53164
A007	19	53164
A007	19	53164
A007	19	53164
A007	19	53164
A007	19	53164
A007	19	53164
A007	19	53164
A007	19	53164
A007	19	53164
A007	19	53164
A007	19	53164
A007	19	53164
A007	19	53164
A007	19	53164
A007	19	53164
A007	19	53164
A007	19	53164
A007	19	53164
A007	19	53164
A007	19	53164
A007	19	53164
A007	19	53164
A007	19	53164
A007	19	53164
A007	19	53164
A007	19	53164
A007	19	53164
A007	19	53164
A007	19	53164
A007	19	53164
A007	19	53164
A007	22	55402
A007	22	55402
A007	22	55402
A007	22	55402
A007	22	55402
A007	22	55402
A007	22	55402
A007	22	55402
A007	22	55402
A007	22	55402
A007	22	55402
A007	22	55402
A007	22	55402
A007	22	55402
A007	22	55402
A007	22	55402
A007	22	55402
A007	22	55402
A007	22	55402
A007	22	55402
A007	22	55402
A007	22	55402
A007	22	55402
A007	22	55402
A007	22	55402
A007	22	55402
A007	22	55402
A007	22	55402
A007	22	55402
A007	22	55402
A007	22	55402
A007	22	55402
A007	22	55402
A007	22	55402
A007	22	55402
A007	22	55402
A007	22	55402
A007	22	55402
A007	23.7	54103
A007	23.7	54103
A007	23.7	54103
A007	23.7	54103
A007	23.7	54103
A007	23.7	54103
A007	23.7	54103
A007	23.7	54103
A007	23.7	54103
A007	23.7	54103
A007	23.7	54103
A007	23.7	54103
A007	23.7	54103
A007	23.7	54103
A007	23.7	54103
A007	23.7	54103
A007	23.7	54103
A007	23.7	54103
A007	23.7	54103
A007	23.7	54103
A007	23.7	54103
A007	23.7	54103
A007	23.7	54103
A007	23.7	54103
A007	23.7	54103
A007	23.7	54103
A007	23.7	54103
A007	23.7	54103
A007	23.7	54103
A007	23.7	54103
A007	23.7	54103
A007	23.7	54103
A007	23.7	54103
A007	23.7	54103
A007	23.7	54103
A007	23.7	54103
A007	23.7	54103
A007	23.7	54103
A007	23.5	49997
A007	23.5	49997
A007	23.5	49997
A007	23.5	49997
A007	23.5	49997
A007	23.5	49997
A007	23.5	49997
A007	23.5	49997
A007	23.5	49997
A007	23.5	49997
A007	23.5	49997
A007	23.5	49997
A007	23.5	49997
A007	23.5	49997
A007	23.5	49997
A007	23.5	49997
A007	23.5	49997
A007	23.5	49997
A007	23.5	49997
A007	23.5	49997
A007	23.5	49997
A007	23.5	49997
A007	23.5	49997
A007	23.5	49997
A007	23.5	49997
A007	23.5	49997
A007	23.5	49997
A007	23.5	49997
A007	23.5	49997
A007	23.5	49997
A007	23.5	49997
A007	23.5	49997
A007	23.5	49997
A007	23.5	49997
A007	23.5	49997
A007	23.5	49997
A007	23.5	49997
A007	23.5	49997
A007	20.4	44808
A007	20.4	44808
A007	20.4	44808
A007	20.4	44808
A007	20.4	44808
A007	20.4	44808
A007	20.4	44808
A007	20.4	44808
A007	20.4	44808
A007	20.4	44808
A007	20.4	44808
A007	20.4	44808
A007	20.4	44808
A007	20.4	44808
A007	20.4	44808
A007	20.4	44808
A007	20.4	44808
A007	20.4	44808
A007	20.4	44808
A007	20.4	44808
A007	20.4	44808
A007	20.4	44808
A007	20.4	44808
A007	20.4	44808
A007	20.4	44808
A007	20.4	44808
A007	20.4	44808
A007	20.4	44808
A007	20.4	44808
A007	20.4	44808
A007	20.4	44808
A007	20.4	44808
A007	20.4	44808
A007	20.4	44808
A007	20.4	44808
A007	20.4	44808
A007	20.4	44808
A007	20.4	44808
A007	15.6	39441
A007	15.6	39441
A007	15.6	39441
A007	15.6	39441
A007	15.6	39441
A007	15.6	39441
A007	15.6	39441
A007	15.6	39441
A007	15.6	39441
A007	15.6	39441
A007	15.6	39441
A007	15.6	39441
A007	15.6	39441
A007	15.6	39441
A007	15.6	39441
A007	15.6	39441
A007	15.6	39441
A007	15.6	39441
A007	15.6	39441
A007	15.6	39441
A007	15.6	39441
A007	15.6	39441
A007	15.6	39441
A007	15.6	39441
A007	15.6	39441
A007	15.6	39441
A007	15.6	39441
A007	15.6	39441
A007	15.6	39441
A007	15.6	39441
A007	15.6	39441
A007	15.6	39441
A007	15.6	39441
A007	15.6	39441
A007	15.6	39441
A007	15.6	39441
A007	15.6	39441
A007	15.6	39441
A007	10	34738
A007	10	34738
A007	10	34738
A007	10	34738
A007	10	34738
A007	10	34738
A007	10	34738
A007	10	34738
A007	10	34738
A007	10	34738
A007	10	34738
A007	10	34738
A007	10	34738
A007	10	34738
A007	10	34738
A007	10	34738
A007	10	34738
A007	10	34738
A007	10	34738
A007	10	34738
A007	10	34738
A007	10	34738
A007	10	34738
A007	10	34738
A007	10	34738
A007	10	34738
A007	10	34738
A007	10	34738
A007	10	34738
A007	10	34738
A007	10	34738
A007	10	34738
A007	10	34738
A007	10	34738
A007	10	34738
A007	10	34738
A007	10	34738
A007	10	34738
A007	7.2	32380
A007	7.2	32380
A007	7.2	32380
A007	7.2	32380
A007	7.2	32380
A007	7.2	32380
A007	7.2	32380
A007	7.2	32380
A007	7.2	32380
A007	7.2	32380
A007	7.2	32380
A007	7.2	32380
A007	7.2	32380
A007	7.2	32380
A007	7.2	32380
A007	7.2	32380
A007	7.2	32380
A007	7.2	32380
A007	7.2	32380
A007	7.2	32380
A007	7.2	32380
A007	7.2	32380
A007	7.2	32380
A007	7.2	32380
A007	7.2	32380
A007	7.2	32380
A007	7.2	32380
A007	7.2	32380
A007	7.2	32380
A007	7.2	32380
A007	7.2	32380
A007	7.2	32380
A007	7.2	32380
A007	7.2	32380
A007	7.2	32380
A007	7.2	32380
A007	7.2	32380
A007	7.2	32380
A008	7.7	33751
A008	7.7	33751
A008	7.7	33751
A008	7.7	33751
A008	7.7	33751
A008	7.7	33751
A008	7.7	33751
A008	7.7	33751
A008	7.7	33751
A008	7.7	33751
A008	7.7	33751
A008	7.7	33751
A008	7.7	33751
A008	7.7	33751
A008	7.7	33751
A008	7.7	33751
A008	7.7	33751
A008	7.7	33751
A008	7.7	33751
A008	7.7	33751
A008	7.7	33751
A008	7.7	33751
A008	7.7	33751
A008	7.7	33751
A008	7.7	33751
A008	7.7	33751
A008	7.7	33751
A008	7.7	33751
A008	7.7	33751
A008	7.7	33751
A008	7.7	33751
A008	7.7	33751
A008	7.7	33751
A008	7.7	33751
A008	7.7	33751
A008	7.7	33751
A008	7.7	33751
A008	7.7	33751
A008	6.6	37953
A008	6.6	37953
A008	6.6	37953
A008	6.6	37953
A008	6.6	37953
A008	6.6	37953
A008	6.6	37953
A008	6.6	37953
A008	6.6	37953
A008	6.6	37953
A008	6.6	37953
A008	6.6	37953
A008	6.6	37953
A008	6.6	37953
A008	6.6	37953
A008	6.6	37953
A008	6.6	37953
A008	6.6	37953
A008	6.6	37953
A008	6.6	37953
A008	6.6	37953
A008	6.6	37953
A008	6.6	37953
A008	6.6	37953
A008	6.6	37953
A008	6.6	37953
A008	6.6	37953
A008	6.6	37953
A008	6.6	37953
A008	6.6	37953
A008	6.6	37953
A008	6.6	37953
A008	6.6	37953
A008	6.6	37953
A008	6.6	37953
A008	6.6	37953
A008	6.6	37953
A008	6.6	37953
A008	11	43200
A008	11	43200
A008	11	43200
A008	11	43200
A008	11	43200
A008	11	43200
A008	11	43200
A008	11	43200
A008	11	43200
A008	11	43200
A008	11	43200
A008	11	43200
A008	11	43200
A008	11	43200
A008	11	43200
A008	11	43200
A008	11	43200
A008	11	43200
A008	11	43200
A008	11	43200
A008	11	43200
A008	11	43200
A008	11	43200
A008	11	43200
A008	11	43200
A008	11	43200
A008	11	43200
A008	11	43200
A008	11	43200
A008	11	43200
A008	11	43200
A008	11	43200
A008	11	43200
A008	11	43200
A008	11	43200
A008	11	43200
A008	11	43200
A008	11	43200
A008	12	48610
A008	12	48610
A008	12	48610
A008	12	48610
A008	12	48610
A008	12	48610
A008	12	48610
A008	12	48610
A008	12	48610
A008	12	48610
A008	12	48610
A008	12	48610
A008	12	48610
A008	12	48610
A008	12	48610
A008	12	48610
A008	12	48610
A008	12	48610
A008	12	48610
A008	12	48610
A008	12	48610
A008	12	48610
A008	12	48610
A008	12	48610
A008	12	48610
A008	12	48610
A008	12	48610
A008	12	48610
A008	12	48610
A008	12	48610
A008	12	48610
A008	12	48610
A008	12	48610
A008	12	48610
A008	12	48610
A008	12	48610
A008	12	48610
A008	12	48610
A008	17	53164
A008	17	53164
A008	17	53164
A008	17	53164
A008	17	53164
A008	17	53164
A008	17	53164
A008	17	53164
A008	17	53164
A008	17	53164
A008	17	53164
A008	17	53164
A008	17	53164
A008	17	53164
A008	17	53164
A008	17	53164
A008	17	53164
A008	17	53164
A008	17	53164
A008	17	53164
A008	17	53164
A008	17	53164
A008	17	53164
A008	17	53164
A008	17	53164
A008	17	53164
A008	17	53164
A008	17	53164
A008	17	53164
A008	17	53164
A008	17	53164
A008	17	53164
A008	17	53164
A008	17	53164
A008	17	53164
A008	17	53164
A008	17	53164
A008	17	53164
A008	21	55402
A008	21	55402
A008	21	55402
A008	21	55402
A008	21	55402
A008	21	55402
A008	21	55402
A008	21	55402
A008	21	55402
A008	21	55402
A008	21	55402
A008	21	55402
A008	21	55402
A008	21	55402
A008	21	55402
A008	21	55402
A008	21	55402
A008	21	55402
A008	21	55402
A008	21	55402
A008	21	55402
A008	21	55402
A008	21	55402
A008	21	55402
A008	21	55402
A008	21	55402
A008	21	55402
A008	21	55402
A008	21	55402
A008	21	55402
A008	21	55402
A008	21	55402
A008	21	55402
A008	21	55402
A008	21	55402
A008	21	55402
A008	21	55402
A008	21	55402
A008	23	54103
A008	23	54103
A008	23	54103
A008	23	54103
A008	23	54103
A008	23	54103
A008	23	54103
A008	23	54103
A008	23	54103
A008	23	54103
A008	23	54103
A008	23	54103
A008	23	54103
A008	23	54103
A008	23	54103
A008	23	54103
A008	23	54103
A008	23	54103
A008	23	54103
A008	23	54103
A008	23	54103
A008	23	54103
A008	23	54103
A008	23	54103
A008	23	54103
A008	23	54103
A008	23	54103
A008	23	54103
A008	23	54103
A008	23	54103
A008	23	54103
A008	23	54103
A008	23	54103
A008	23	54103
A008	23	54103
A008	23	54103
A008	23	54103
A008	23	54103
A008	23	49997
A008	23	49997
A008	23	49997
A008	23	49997
A008	23	49997
A008	23	49997
A008	23	49997
A008	23	49997
A008	23	49997
A008	23	49997
A008	23	49997
A008	23	49997
A008	23	49997
A008	23	49997
A008	23	49997
A008	23	49997
A008	23	49997
A008	23	49997
A008	23	49997
A008	23	49997
A008	23	49997
A008	23	49997
A008	23	49997
A008	23	49997
A008	23	49997
A008	23	49997
A008	23	49997
A008	23	49997
A008	23	49997
A008	23	49997
A008	23	49997
A008	23	49997
A008	23	49997
A008	23	49997
A008	23	49997
A008	23	49997
A008	23	49997
A008	23	49997
A008	18	44808
A008	18	44808
A008	18	44808
A008	18	44808
A008	18	44808
A008	18	44808
A008	18	44808
A008	18	44808
A008	18	44808
A008	18	44808
A008	18	44808
A008	18	44808
A008	18	44808
A008	18	44808
A008	18	44808
A008	18	44808
A008	18	44808
A008	18	44808
A008	18	44808
A008	18	44808
A008	18	44808
A008	18	44808
A008	18	44808
A008	18	44808
A008	18	44808
A008	18	44808
A008	18	44808
A008	18	44808
A008	18	44808
A008	18	44808
A008	18	44808
A008	18	44808
A008	18	44808
A008	18	44808
A008	18	44808
A008	18	44808
A008	18	44808
A008	18	44808
A008	14	39441
A008	14	39441
A008	14	39441
A008	14	39441
A008	14	39441
A008	14	39441
A008	14	39441
A008	14	39441
A008	14	39441
A008	14	39441
A008	14	39441
A008	14	39441
A008	14	39441
A008	14	39441
A008	14	39441
A008	14	39441
A008	14	39441
A008	14	39441
A008	14	39441
A008	14	39441
A008	14	39441
A008	14	39441
A008	14	39441
A008	14	39441
A008	14	39441
A008	14	39441
A008	14	39441
A008	14	39441
A008	14	39441
A008	14	39441
A008	14	39441
A008	14	39441
A008	14	39441
A008	14	39441
A008	14	39441
A008	14	39441
A008	14	39441
A008	14	39441
A008	9	34738
A008	9	34738
A008	9	34738
A008	9	34738
A008	9	34738
A008	9	34738
A008	9	34738
A008	9	34738
A008	9	34738
A008	9	34738
A008	9	34738
A008	9	34738
A008	9	34738
A008	9	34738
A008	9	34738
A008	9	34738
A008	9	34738
A008	9	34738
A008	9	34738
A008	9	34738
A008	9	34738
A008	9	34738
A008	9	34738
A008	9	34738
A008	9	34738
A008	9	34738
A008	9	34738
A008	9	34738
A008	9	34738
A008	9	34738
A008	9	34738
A008	9	34738
A008	9	34738
A008	9	34738
A008	9	34738
A008	9	34738
A008	9	34738
A008	9	34738
A008	6	32380
A008	6	32380
A008	6	32380
A008	6	32380
A008	6	32380
A008	6	32380
A008	6	32380
A008	6	32380
A008	6	32380
A008	6	32380
A008	6	32380
A008	6	32380
A008	6	32380
A008	6	32380
A008	6	32380
A008	6	32380
A008	6	32380
A008	6	32380
A008	6	32380
A008	6	32380
A008	6	32380
A008	6	32380
A008	6	32380
A008	6	32380
A008	6	32380
A008	6	32380
A008	6	32380
A008	6	32380
A008	6	32380
A008	6	32380
A008	6	32380
A008	6	32380
A008	6	32380
A008	6	32380
A008	6	32380
A008	6	32380
A008	6	32380
A008	6	32380
A009	4	33751
A009	4	33751
A009	4	33751
A009	4	33751
A009	4	33751
A009	4	33751
A009	4	33751
A009	4	33751
A009	4	33751
A009	4	33751
A009	4	33751
A009	4	33751
A009	4	33751
A009	4	33751
A009	4	33751
A009	4	33751
A009	4	33751
A009	4	33751
A009	4	33751
A009	4	33751
A009	4	33751
A009	4	33751
A009	4	33751
A009	4	33751
A009	4	33751
A009	4	33751
A009	4	33751
A009	4	33751
A009	4	33751
A009	4	33751
A009	4	33751
A009	4	33751
A009	4	33751
A009	4	33751
A009	4	33751
A009	4	33751
A009	4	33751
A009	4	33751
A009	7	37953
A009	7	37953
A009	7	37953
A009	7	37953
A009	7	37953
A009	7	37953
A009	7	37953
A009	7	37953
A009	7	37953
A009	7	37953
A009	7	37953
A009	7	37953
A009	7	37953
A009	7	37953
A009	7	37953
A009	7	37953
A009	7	37953
A009	7	37953
A009	7	37953
A009	7	37953
A009	7	37953
A009	7	37953
A009	7	37953
A009	7	37953
A009	7	37953
A009	7	37953
A009	7	37953
A009	7	37953
A009	7	37953
A009	7	37953
A009	7	37953
A009	7	37953
A009	7	37953
A009	7	37953
A009	7	37953
A009	7	37953
A009	7	37953
A009	7	37953
A009	11	43200
A009	11	43200
A009	11	43200
A009	11	43200
A009	11	43200
A009	11	43200
A009	11	43200
A009	11	43200
A009	11	43200
A009	11	43200
A009	11	43200
A009	11	43200
A009	11	43200
A009	11	43200
A009	11	43200
A009	11	43200
A009	11	43200
A009	11	43200
A009	11	43200
A009	11	43200
A009	11	43200
A009	11	43200
A009	11	43200
A009	11	43200
A009	11	43200
A009	11	43200
A009	11	43200
A009	11	43200
A009	11	43200
A009	11	43200
A009	11	43200
A009	11	43200
A009	11	43200
A009	11	43200
A009	11	43200
A009	11	43200
A009	11	43200
A009	11	43200
A009	13	48610
A009	13	48610
A009	13	48610
A009	13	48610
A009	13	48610
A009	13	48610
A009	13	48610
A009	13	48610
A009	13	48610
A009	13	48610
A009	13	48610
A009	13	48610
A009	13	48610
A009	13	48610
A009	13	48610
A009	13	48610
A009	13	48610
A009	13	48610
A009	13	48610
A009	13	48610
A009	13	48610
A009	13	48610
A009	13	48610
A009	13	48610
A009	13	48610
A009	13	48610
A009	13	48610
A009	13	48610
A009	13	48610
A009	13	48610
A009	13	48610
A009	13	48610
A009	13	48610
A009	13	48610
A009	13	48610
A009	13	48610
A009	13	48610
A009	13	48610
A009	18	53164
A009	18	53164
A009	18	53164
A009	18	53164
A009	18	53164
A009	18	53164
A009	18	53164
A009	18	53164
A009	18	53164
A009	18	53164
A009	18	53164
A009	18	53164
A009	18	53164
A009	18	53164
A009	18	53164
A009	18	53164
A009	18	53164
A009	18	53164
A009	18	53164
A009	18	53164
A009	18	53164
A009	18	53164
A009	18	53164
A009	18	53164
A009	18	53164
A009	18	53164
A009	18	53164
A009	18	53164
A009	18	53164
A009	18	53164
A009	18	53164
A009	18	53164
A009	18	53164
A009	18	53164
A009	18	53164
A009	18	53164
A009	18	53164
A009	18	53164
A009	22	55402
A009	22	55402
A009	22	55402
A009	22	55402
A009	22	55402
A009	22	55402
A009	22	55402
A009	22	55402
A009	22	55402
A009	22	55402
A009	22	55402
A009	22	55402
A009	22	55402
A009	22	55402
A009	22	55402
A009	22	55402
A009	22	55402
A009	22	55402
A009	22	55402
A009	22	55402
A009	22	55402
A009	22	55402
A009	22	55402
A009	22	55402
A009	22	55402
A009	22	55402
A009	22	55402
A009	22	55402
A009	22	55402
A009	22	55402
A009	22	55402
A009	22	55402
A009	22	55402
A009	22	55402
A009	22	55402
A009	22	55402
A009	22	55402
A009	22	55402
A009	25	54103
A009	25	54103
A009	25	54103
A009	25	54103
A009	25	54103
A009	25	54103
A009	25	54103
A009	25	54103
A009	25	54103
A009	25	54103
A009	25	54103
A009	25	54103
A009	25	54103
A009	25	54103
A009	25	54103
A009	25	54103
A009	25	54103
A009	25	54103
A009	25	54103
A009	25	54103
A009	25	54103
A009	25	54103
A009	25	54103
A009	25	54103
A009	25	54103
A009	25	54103
A009	25	54103
A009	25	54103
A009	25	54103
A009	25	54103
A009	25	54103
A009	25	54103
A009	25	54103
A009	25	54103
A009	25	54103
A009	25	54103
A009	25	54103
A009	25	54103
A009	25	49997
A009	25	49997
A009	25	49997
A009	25	49997
A009	25	49997
A009	25	49997
A009	25	49997
A009	25	49997
A009	25	49997
A009	25	49997
A009	25	49997
A009	25	49997
A009	25	49997
A009	25	49997
A009	25	49997
A009	25	49997
A009	25	49997
A009	25	49997
A009	25	49997
A009	25	49997
A009	25	49997
A009	25	49997
A009	25	49997
A009	25	49997
A009	25	49997
A009	25	49997
A009	25	49997
A009	25	49997
A009	25	49997
A009	25	49997
A009	25	49997
A009	25	49997
A009	25	49997
A009	25	49997
A009	25	49997
A009	25	49997
A009	25	49997
A009	25	49997
A009	21	44808
A009	21	44808
A009	21	44808
A009	21	44808
A009	21	44808
A009	21	44808
A009	21	44808
A009	21	44808
A009	21	44808
A009	21	44808
A009	21	44808
A009	21	44808
A009	21	44808
A009	21	44808
A009	21	44808
A009	21	44808
A009	21	44808
A009	21	44808
A009	21	44808
A009	21	44808
A009	21	44808
A009	21	44808
A009	21	44808
A009	21	44808
A009	21	44808
A009	21	44808
A009	21	44808
A009	21	44808
A009	21	44808
A009	21	44808
A009	21	44808
A009	21	44808
A009	21	44808
A009	21	44808
A009	21	44808
A009	21	44808
A009	21	44808
A009	21	44808
A009	15	39441
A009	15	39441
A009	15	39441
A009	15	39441
A009	15	39441
A009	15	39441
A009	15	39441
A009	15	39441
A009	15	39441
A009	15	39441
A009	15	39441
A009	15	39441
A009	15	39441
A009	15	39441
A009	15	39441
A009	15	39441
A009	15	39441
A009	15	39441
A009	15	39441
A009	15	39441
A009	15	39441
A009	15	39441
A009	15	39441
A009	15	39441
A009	15	39441
A009	15	39441
A009	15	39441
A009	15	39441
A009	15	39441
A009	15	39441
A009	15	39441
A009	15	39441
A009	15	39441
A009	15	39441
A009	15	39441
A009	15	39441
A009	15	39441
A009	15	39441
A009	12	34738
A009	12	34738
A009	12	34738
A009	12	34738
A009	12	34738
A009	12	34738
A009	12	34738
A009	12	34738
A009	12	34738
A009	12	34738
A009	12	34738
A009	12	34738
A009	12	34738
A009	12	34738
A009	12	34738
A009	12	34738
A009	12	34738
A009	12	34738
A009	12	34738
A009	12	34738
A009	12	34738
A009	12	34738
A009	12	34738
A009	12	34738
A009	12	34738
A009	12	34738
A009	12	34738
A009	12	34738
A009	12	34738
A009	12	34738
A009	12	34738
A009	12	34738
A009	12	34738
A009	12	34738
A009	12	34738
A009	12	34738
A009	12	34738
A009	12	34738
A009	7	32380
A009	7	32380
A009	7	32380
A009	7	32380
A009	7	32380
A009	7	32380
A009	7	32380
A009	7	32380
A009	7	32380
A009	7	32380
A009	7	32380
A009	7	32380
A009	7	32380
A009	7	32380
A009	7	32380
A009	7	32380
A009	7	32380
A009	7	32380
A009	7	32380
A009	7	32380
A009	7	32380
A009	7	32380
A009	7	32380
A009	7	32380
A009	7	32380
A009	7	32380
A009	7	32380
A009	7	32380
A009	7	32380
A009	7	32380
A009	7	32380
A009	7	32380
A009	7	32380
A009	7	32380
A009	7	32380
A009	7	32380
A009	7	32380
A009	7	32380
